# Supplementary material
Source: publisher figshare collection journal article supplement (https://rs.figshare.com/ndownloader/files/12940124)
Supplement: Supplementary file 1 [file 12940124]

## Sheet: Shrike929mKinematics
Electronic Supplementary Materials for:
Come on baby, let’s do the twist: the kinematics of killing in loggerhead shrikes
Diego Sustaita, Margaret A. Rubega, and Susan M. Farabaugh
Data S2. Landmark 2D coordinates of shrike head, mouse head, and mouse body, along with their angles, velocities, and accelerations computed for each frame of electronic supplementary materials video S1. Cells with blue font contain formulas.																																												Filtered data
																																													Missing values were assigned the average between the value before and the value after to allow filter to perform; these values were then deleted for subsequent analysis
Images of sequence randomized using "Filename Randomizer" macro in imageJ for tracking, then sorted to restore original order						Blank = occluded or indicipherable landmark												Calibration = 14.0322 pix/cm																						If Rmask angle = nan, then Lmask angle reflected based on average mask vertex (i.e., Rmask-BeakCent-Lmask) angle of 93.46°	Green cells = values manually reflected from negative to positive to to error in angle function					30		Peaks:	70.5568
Rand1	Image	OriginalImageID	BeakCentX	BeakCentY		RmaskX	RmaskY		LmaskX	LmaskY		RostX	RostY		RumpX	RumpY		BeakCentX (cm)	BeakCentY (cm)		RmaskX (cm)	RmaskY (cm)		LmaskX (cm)	LmaskY (cm)		RostX (cm)	RostY (cm)		RumpX (cm)	RumpY (cm)		ShrikeHeadLine (cm)	MouseHeadLine (cm)	MouseBodyLine (cm)		Time (s)	RmaskAngle(°)	LmaskAngle(°)	ShrikeHeadAngle (°)	MouseHeadAngle (°)	MouseBodyAngle (°)		time	data1	butfilt1	velocity	acceleration	ω
45	929m_mouse2_02-22-11_ForReAnalysis_Rand1:00000042_1	1	892.667	408		860	383.333		909.333	374.667		928	442		838	440.667		63.6156	29.076		61.2876	27.3181		64.8033	26.7005		66.1336	31.499		59.7198	31.404		2.91715	3.49446	4.5384		0	37.0566	-63.4356	37.0566	43.8986	-30.861		0	37.0566	37.8893	519.302	51535.7	9.06353
29	929m_mouse2_02-22-11_ForReAnalysis_Rand1:00000022_2	2	896.667	404.667		866.667	375.333					920.667	442.667		832.667	438.667		63.9007	28.8385		61.7627	26.748		nan	nan		65.611	31.5465		59.3397	31.2615		2.99013	3.20295	5.1646		0.008	44.3569	nan	44.3569	57.7244	-27.9795		0.008	44.3569	46.1981	1343.87	55951.5	23.455
5	929m_mouse2_02-22-11_ForReAnalysis_Rand1:00000003_3	3	901.333	402		881.333	366.667					907.333	444.667		828	436.667		64.2332	28.6484		62.8079	26.1304		nan	nan		64.6608	31.689		59.0071	31.1189		2.8934	3.07057	5.78058		0.016	60.4883	nan	60.4883	81.9953	-25.3017		0.016	60.4883	59.3912	1414.53	-55973.9	24.6881
16	929m_mouse2_02-22-11_ForReAnalysis_Rand1:00000012_4	4	906	404.667		890	363.333					894.667	448		824.667	432		64.5658	28.8385		63.4255	25.8928		nan	nan		63.7581	31.9266		58.7696	30.7863		3.15864	3.19198	6.11472		0.024	68.8391	nan	68.8391	75.3436	-18.5756		0.024	68.8391	68.8305	448.291	-150920	7.82415
2	929m_mouse2_02-22-11_ForReAnalysis_Rand1:00000002_5	5	907.333	405.333		892	365.333					901.333	450		828	418.667		64.6608	28.8859		63.5681	26.0353		nan	nan		64.2332	32.0691		59.0071	29.8362		3.05284	3.21177	5.73294		0.032	69.0269	nan	69.0269	82.3494	-9.54089		0.032	69.0269	66.5639	-1000.2	-148262	-17.4567
27	929m_mouse2_02-22-11_ForReAnalysis_Rand1:00000020_6	6	902	404.667		876	372.667					912	444.667		828	408.667		64.2807	28.8385		62.4278	26.558		nan	nan		64.9934	31.689		59.0071	29.1235		2.93832	2.93832	5.28128		0.04	50.9061	nan	50.9061	75.9638	-3.09406		0.04	50.9061	52.8273	-1923.9	-40016.6	-33.5784
28	929m_mouse2_02-22-11_ForReAnalysis_Rand1:00000021_7	7	895.333	406					915.333	376.667		924	439.333		828	400		63.8056	28.9335		nan	nan		65.2309	26.843		65.8485	31.3089		59.0071	28.5059			3.13312	4.81748		0.048	nan	-55.7128	37.7472	49.3039	5.09214		0.048	37.7472	35.7815	-1640.46	110275	-28.6315
43	929m_mouse2_02-22-11_ForReAnalysis_Rand1:00000041_8	8	889.333	404					904	365.333		928	426.667		834	398		63.378	28.7909		nan	nan		64.4233	26.0353		66.1336	30.4063		59.4347	28.3633			3.19416	3.9664		0.056	nan	-69.2275	24.2325	30.3793	6.18865		0.056	24.2325	26.5799	-159.492	208063	-2.78365
22	929m_mouse2_02-22-11_ForReAnalysis_Rand1:00000017_9	9	886	401.333					906.667	363.333		927.333	426		834.667	406		63.1405	28.6009		nan	nan		64.6133	25.8928		66.0861	30.3587		59.4823	28.9335			3.43025	3.67332		0.064	nan	-61.4596	32.0004	30.8282	-5.19483		0.064	32.0004	33.2296	1688.55	173180	29.4708
47	929m_mouse2_02-22-11_ForReAnalysis_Rand1:0000046_10	10	893.333	399.333		874.667	374		921.333	371.333		922.667	438		832	413.333		63.6631	28.4583		62.3328	26.653		65.6585	26.4629		65.7536	31.2139		59.2922	29.456		2.24249	3.45881	4.4833		0.072	53.6163	-45	53.6163	52.8149	-12.8582		0.072	53.6163	53.5968	2611.39	10866.1	45.5774
23	929m_mouse2_02-22-11_ForReAnalysis_Rand1:0000017_11	11	902.667	404		892.667	363.333					912	447.333		829.333	418		64.3283	28.7909		63.6156	25.8928		nan	nan		64.9934	31.879		59.1021	29.7886		2.98445	3.15893	5.32051		0.08	76.1851	nan	76.1851	77.8454	-10.8081		0.08	76.1851	75.0119	1862.41	-172339	32.5052
64	929m_mouse2_02-22-11_ForReAnalysis_Rand1:0000063_12	12	909.333	404		904.667	359.333					906.667	449.333		828.667	418		64.8033	28.7909		64.4708	25.6077		nan	nan		64.6133	32.0216		59.0547	29.7886		3.2005	3.23622	5.83457		0.088	84.0364	nan	84.0364	86.6344	-9.8459		0.088	84.0364	83.3953	-146.024	-253898	-2.54859
15	929m_mouse2_02-22-11_ForReAnalysis_Rand1:0000011_13	13	910	404.667		898	361.333					910.667	448.667		836.667	412.667		64.8508	28.8385		63.9957	25.7503		nan	nan		64.8984	31.9741		59.6248	29.4086		3.2044	3.13601	5.25706		0.096	74.5216	nan	74.5216	89.1315	-6.22586		0.096	74.5216	72.6755	-2199.97	-192632	-38.3966
33	929m_mouse2_02-22-11_ForReAnalysis_Rand1:0000027_14	14	909.333	400		880.667	369.333					918.667	444.667		838.667	410		64.8033	28.5059		62.7604	26.3204		nan	nan		65.4685	31.689		59.7673	29.2185		2.99159	3.25194	5.08616		0.104	46.9316	nan	46.9316	78.1968	-8.05449		0.104	46.9316	48.1959	-3228.13	-49630	-56.3416
51	929m_mouse2_02-22-11_ForReAnalysis_Rand1:0000050_15	15	906.667	398.667					917.333	359.333					842.667	412.667		64.6133	28.4109		nan	nan		65.3734	25.6077		nan	nan		60.0524	29.4086				4.66879		0.112	nan	-74.8282	18.6318		-12.3391		0.112	18.6318	21.0254	-2994.05	100578	-52.2559
1	929m_mouse2_02-22-11_ForReAnalysis_Rand1:0000001_16	16	902	394.667					904.667	350.667		944	399.333		848.667	421.333		64.2807	28.1258		nan	nan		64.4708	24.9902		67.2738	28.4583		60.48	30.0262			3.01153	4.24936		0.12	nan	-86.5313	6.92866	6.33929	-26.5646		0.12	6.92866	0.291132	-1618.88	223305	-28.2549
37	929m_mouse2_02-22-11_ForReAnalysis_Rand1:0000029_17	17	902.667	388					895.333	348		941.333	388.667		864.667	440.667		64.3283	27.6507		nan	nan		63.8056	24.8001		67.0838	27.6982		61.6202	31.404			2.75593	4.62826		0.128	nan	79.6102	-13.8498	0.988271	-54.189		0.128	-13.8498	-4.87674	578.832	238930	10.1025
52	929m_mouse2_02-22-11_ForReAnalysis_Rand1:0000050_18	18	898.667	386.667					903.333	345.333		941.333	390		871.333	446		64.0432	27.5557		nan	nan		64.3757	24.61		67.0838	27.7932		62.0953	31.784			3.04984	4.65547		0.136	nan	-83.5594	9.90058	4.46678	-65.265		0.136	9.90058	9.55245	2203.99	85470.3	38.4669
55	929m_mouse2_02-22-11_ForReAnalysis_Rand1:0000053_19	19	900.667	378					919.333	349.333		939.333	402		873.333	446.667		64.1857	26.938		nan	nan		65.516	24.8951		66.9412	28.6484		62.2378	31.8316			3.24318	5.26699		0.144	nan	-56.9306	36.5294	31.8279	-68.2942		0.144	36.5294	30.3871	1946.36	-99456.4	33.9703
39	929m_mouse2_02-22-11_ForReAnalysis_Rand1:0000035_20	20	910.667	375.333		884.667	354.667		932.667	354		935.333	415.333		870	444		64.8984	26.748		63.0455	25.2752		66.4662	25.2277		66.6562	29.5986		62.0003	31.6415		2.36689	3.34899	5.68733		0.152	38.4793	-44.1181	38.4793	58.3399	-59.3645		0.152	38.4793	40.6941	612.687	-130373	10.6934
17	929m_mouse2_02-22-11_ForReAnalysis_Rand1:0000012_21	21	918	374.667		891.333	351.333		936	362		935.333	418.667		865.333	435.333		65.421	26.7005		63.5205	25.0376		66.7037	25.7978		66.6562	29.8362		61.6677	31.0239		2.52523	3.37017	5.72525		0.16	41.1864	-35.1349	41.1864	68.4989	-49.0372		0.16	41.1864	40.1901	-139.607	-39462	-2.43661
3	929m_mouse2_02-22-11_ForReAnalysis_Rand1:0000002_22	22	921.333	375.333		888.667	352		935.333	356.667		941.333	417.333		858	420.667		65.6585	26.748		63.3306	25.0852		66.6562	25.4178		67.0838	29.7411		61.1451	29.9787		2.86081	3.31515	5.55052		0.168	35.5378	-53.1291	35.5378	64.5367	-35.5952		0.168	35.5378	38.4604	-18.705	22850.6	-0.326464
9	929m_mouse2_02-22-11_ForReAnalysis_Rand1:0000006_23	23	919.333	380.667		889.333	354		937.333	356		946.667	418.667		851.333	408.667		65.516	27.1281		63.378	25.2277		66.7987	25.3702		67.4639	29.8362		60.67	29.1235		2.86048	3.33588	5.24074		0.176	41.6339	-53.881	41.6339	54.2719	-22.3801		0.176	41.6339	39.8908	226.002	11760.7	3.94448
18	929m_mouse2_02-22-11_ForReAnalysis_Rand1:0000012_24	24	917.333	379.333		889.333	354		937.333	358.667		944	419.333		852	400.667		65.3734	27.033		63.378	25.2277		66.7987	25.5603		67.2738	29.8836		60.7175	28.5534		2.6909	3.42599	4.89788		0.184	42.1372	-45.9383	42.1372	56.3096	-18.0841		0.184	42.1372	42.0765	169.467	-14720.2	2.95776
42	929m_mouse2_02-22-11_ForReAnalysis_Rand1:0000039_25	25	917.333	378		892.667	355.333		938	358		942.667	422.667		851.333	396		65.3734	26.938		63.6156	25.3227		66.8463	25.5127		67.1788	30.1212		60.67	28.2208		2.38732	3.65953	4.87525		0.192	42.5817	-44.0603	42.5817	60.4392	-15.2551		0.192	42.5817	42.6023	-9.52204	-17599.6	-0.166191
56	929m_mouse2_02-22-11_ForReAnalysis_Rand1:0000053_26	26	918.667	378.667		891.333	354.667		937.333	360		942	421.333		852.667	392.667		65.4685	26.9856		63.5205	25.2752		66.7987	25.6553		67.1313	30.0262		60.765	27.9833		2.59226	3.46556	4.80812		0.2	41.284	-45.0015	41.284	61.3268	-11.9761		0.2	41.284	41.9241	-112.126	-8264.3	-1.95697
48	929m_mouse2_02-22-11_ForReAnalysis_Rand1:0000047_27	27	920	378		894	354.667		940	359.333		941.333	421.333		853.333	391.333		65.5635	26.938		63.7106	25.2752		66.9888	25.6077		67.0838	30.0262		60.8125	27.8882		2.48961	3.44205	4.84508		0.208	41.9055	-43.0256	41.9055	63.7888	-11.3096		0.208	41.9055	40.8083	-141.751	1061.99	-2.47402
60	929m_mouse2_02-22-11_ForReAnalysis_Rand1:0000058_28	28	921.333	379.333		891.333	355.333		939.333	355.333		943.333	420.667		853.333	392.667		65.6585	27.033		63.5205	25.3227		66.9412	25.3227		67.2263	29.9787		60.8125	27.9833		2.7379	3.33691	4.93828		0.216	38.6598	-53.1301	38.6598	61.9759	-11.0943		0.216	38.6598	39.6561	-95.1345	9354.45	-1.66041
61	929m_mouse2_02-22-11_ForReAnalysis_Rand1:0000059_29	29	922	377.333		894	354		940.667	355.333		942.667	418		854	395.333		65.706	26.8905		63.7106	25.2277		67.0363	25.3227		67.1788	29.7886		60.86	28.1733		2.59743	3.2509	5.0129		0.224	39.8052	-49.6854	39.8052	63.0603	-14.8265		0.224	39.8052	39.2861	7.92044	8445.34	0.138238
6	929m_mouse2_02-22-11_ForReAnalysis_Rand1:0000003_30	30	922.667	374		894.667	351.333		940	356.667		944	418.667		854.667	398		65.7536	26.653		63.7581	25.0376		66.9888	25.4178		67.2738	29.8362		60.9076	28.3633		2.5673	3.52759	5.13897		0.232	38.9914	-45	38.9914	64.4708	-19.44		0.232	38.9914	39.7828	39.9911	-3198.07	0.697976
59	929m_mouse2_02-22-11_ForReAnalysis_Rand1:0000055_31	31	921.333	376.667		894.667	353.333		940.667	355.333		944.667	419.333		854.667	399.333		65.6585	26.843		63.7581	25.1802		67.0363	25.3227		67.3214	29.8836		60.9076	28.4583		2.52517	3.46559	5.01802		0.24	41.1874	-47.8155	41.1874	61.3258	-18.7777		0.24	41.1874	39.926	-43.2487	-10683	-0.754833
34	929m_mouse2_02-22-11_ForReAnalysis_Rand1:0000027_32	32	922.667	375.333		896.667	354.667		940.667	356.667		944.667	418		852	403.333		65.7536	26.748		63.9007	25.2752		67.0363	25.4178		67.3214	29.7886		60.7175	28.7434		2.36689	3.42105	5.41697		0.248	38.4793	-46.0406	38.4793	62.7234	-21.6147		0.248	38.4793	39.0908	-130.936	-11172.1	-2.28527
7	929m_mouse2_02-22-11_ForReAnalysis_Rand1:0000004_33	33	925.333	374		896	352		941.333	359.333		946.667	416		858	412		65.9435	26.653		63.8531	25.0852		67.0838	25.6077		67.4639	29.6461		61.1451	29.361		2.61302	3.35712	5.50988		0.256	36.8702	-42.5111	36.8702	63.0716	-29.4386		0.256	36.8702	37.831	-222.002	-17041.9	-3.87466
36	929m_mouse2_02-22-11_ForReAnalysis_Rand1:0000028_34	34	922.667	374		894.667	352.667		941.333	356.667		947.333	415.333		862	416.667		65.7536	26.653		63.7581	25.1327		67.0838	25.4178		67.5114	29.5986		61.4301	29.6936		2.50857	3.43021	5.28559		0.264	37.3035	-42.8794	37.3035	59.1728	-35.1187		0.264	37.3035	35.5388	-403.607	-18852.1	-7.04427
35	929m_mouse2_02-22-11_ForReAnalysis_Rand1:0000027_35	35	924.667	374		894.667	356		940	358		949.333	415.333		866	426		65.8961	26.653		63.7581	25.3702		66.9888	25.5127		67.6539	29.5986		61.7152	30.3587		2.49324	3.43021	5.58681		0.272	30.9638	-46.2195	30.9638	59.1728	-41.5525		0.272	30.9638	31.3733	-523.635	1342.07	-9.13916
4	929m_mouse2_02-22-11_ForReAnalysis_Rand1:0000002_36	36	924	374.667		891.333	358.667		936	360.667		952.667	414.667		870.667	435.333		65.8485	26.7005		63.5205	25.5603		66.7037	25.7028		67.8915	29.5511		62.0478	31.0239		2.59224	3.50706	5.75648		0.28	26.0952	-49.3987	26.0952	54.3718	-48.6805		0.28	26.0952	27.1607	-382.134	30989.1	-6.66949
30	929m_mouse2_02-22-11_ForReAnalysis_Rand1:0000023_37	37	918	375.333		888.667	360.667		934.667	362		954.667	414		878	442		65.421	26.748		63.3306	25.7028		66.6087	25.7978		68.034	29.5036		62.5704	31.499		2.33713	3.79755	5.54056		0.288	26.5643	-38.6586	26.5643	46.5208	-59.0364		0.288	26.5643	25.2591	-27.8095	53309.8	-0.485368
54	929m_mouse2_02-22-11_ForReAnalysis_Rand1:0000051_38	38	920	378		888.667	362.667		934.667	358.667		955.333	409.333		882	447.333		65.5635	26.938		63.3306	25.8453		66.6087	25.5603		68.0815	29.171		62.8554	31.879		2.48596	3.36546	5.63445		0.296	26.0751	-52.8142	26.0751	41.5663	-61.2738		0.296	26.0751	26.7157	470.823	65460.8	8.21741
57	929m_mouse2_02-22-11_ForReAnalysis_Rand1:0000053_39	39	919.333	380.667		890	362		935.333	358		956.667	412.667		882.667	448.667		65.516	27.1281		63.4255	25.7978		66.6562	25.5127		68.1766	29.4086		62.903	31.9741		2.4778	3.50418	5.50558		0.304	32.472	-54.7828	32.472	40.6008	-61.6662		0.304	32.472	32.7923	1019.56	46266.3	17.7947
49	929m_mouse2_02-22-11_ForReAnalysis_Rand1:0000049_40	40	928.667	382.667		897.333	354.667					949.333	419.333		879.333	448		66.1811	27.2706		63.9481	25.2752		nan	nan		67.6539	29.8836		62.6654	31.9266		2.99466	2.99945	5.83424		0.312	41.7839	nan	41.7839	60.5932	-52.943		0.312	41.7839	43.0287	1211.08	-25941.5	21.1374
25	929m_mouse2_02-22-11_ForReAnalysis_Rand1:0000019_41	41	933.333	384.667		907.333	348.667					942	432		876.667	443.333		66.5137	27.4132		64.6608	24.8476		nan	nan		67.1313	30.7863		62.4754	31.594		3.16466	3.42925	5.81265		0.32	54.1623	nan	54.1623	79.6237	-45.9935		0.32	54.1623	52.1697	604.499	-125196	10.5505
24	929m_mouse2_02-22-11_ForReAnalysis_Rand1:0000017_42	42	936.667	391.333		906.667	354					940.667	438.667		876.667	435.333		66.7513	27.8882		64.6133	25.2277		nan	nan		67.0363	31.2615		62.4754	31.0239		3.41309	3.38526	5.3024		0.328	51.2154	nan	51.2154	85.1696	-36.2538		0.328	51.2154	52.7007	-792.046	-191926	-13.8238
58	929m_mouse2_02-22-11_ForReAnalysis_Rand1:0000054_43	43	928	397.333		896	368.667								874	425.333		66.1336	28.3158		63.8531	26.2729		nan	nan		nan	nan		62.2853	30.3112		3.06168		4.33486		0.336	41.8544	nan	41.8544		-27.4076		0.336	41.8544	39.4969	-2466.31	-167144	-43.0453
32	929m_mouse2_02-22-11_ForReAnalysis_Rand1:0000026_44	44	917.333	402								962	427.333		878.667	416.667		65.3734	28.6484		nan	nan		nan	nan		68.5566	30.4537		62.6179	29.6936			3.6595	2.9471		0.344	nan	nan		29.5598	-20.773		0.344	13.462
26	929m_mouse2_02-22-11_ForReAnalysis_Rand1:0000019_45	45	916.667	408.667					907.333	362.667		968	406		881.333	418.667		65.326	29.1235		nan	nan		64.6608	25.8453		68.9842	28.9335		62.8079	29.8362			3.66316	2.61697		0.352	nan	78.5297	-14.9303	-2.97412	-15.8022		0.352	-14.9303	-15.9647	-2710.59	216623	-47.3088
21	929m_mouse2_02-22-11_ForReAnalysis_Rand1:0000015_46	46	923.333	405.333					900.667	366		967.333	396.667		882.667	432		65.801	28.8859		nan	nan		64.1857	26.0829		68.9367	28.2683		62.903	30.7863			3.19588	3.46558		0.36	nan	60.0469	-33.4131	-11.1421	-33.2551		0.36	-33.4131	-30.1298	-0.382651	367813	-0.00667853
40	929m_mouse2_02-22-11_ForReAnalysis_Rand1:0000037_47	47	922.667	404					911.333	361.333		966.667	402.667		884	447.333		65.7536	28.7909		nan	nan		64.9458	25.7503		68.8892	28.6959		62.998	31.879			3.13708	4.13881		0.368	nan	75.1236	-18.3364	-1.73527	-48.2568		0.368	-18.3364	-15.9708	3174.42	283834	55.4041
10	929m_mouse2_02-22-11_ForReAnalysis_Rand1:0000006_48	48	926.667	398.667								960	425.333		881.333	448.667		66.0386	28.4109		nan	nan		nan	nan		68.4141	30.3112		62.8079	31.9741			3.04206	4.8098		0.376	nan	nan		38.6594	-47.802		0.376	20.8547
38	929m_mouse2_02-22-11_ForReAnalysis_Rand1:0000034_49	49	930.667	394		908	354.667								882	446		66.3237	28.0783		64.7083	25.2752		nan	nan		nan	nan		62.8554	31.784		3.23519		5.07556		0.384	60.0458	nan	60.0458		-46.8963		0.384	60.0458	56.6846	3222.5	-242659	56.2433
62	929m_mouse2_02-22-11_ForReAnalysis_Rand1:0000059_50	50	937.333	399.333		924	351.333					928	442		879.333	439.333		66.7987	28.4583		65.8485	25.0376		nan	nan		66.1336	31.499		62.6654	31.3089		3.55022	3.11254	5.021		0.392	74.4763	nan	74.4763	77.6614	-34.5923		0.392	74.4763	72.221	658.415	-287823	11.4915
13	929m_mouse2_02-22-11_ForReAnalysis_Rand1:0000009_51	51	942.667	398.667		921.333	352.667					930.667	442		879.333	424.667		67.1788	28.4109		65.6585	25.1327		nan	nan		66.3237	31.499		62.6654	30.2638		3.61357	3.20433	4.879		0.4	65.1189	nan	65.1189	74.5212	-22.3192		0.4	65.1189	67.2192	-1382.67	-226009	-24.1321
44	929m_mouse2_02-22-11_ForReAnalysis_Rand1:0000041_52	52	936	390.667		900	358								879.333	414		66.7037	27.8408		64.1382	25.5127		nan	nan		nan	nan		62.6654	29.5036		3.46432		4.3673		0.408	42.2211	nan	42.2211		-22.3797		0.408	42.2211	50.0983	-2957.73	-166246	-51.6221
14	929m_mouse2_02-22-11_ForReAnalysis_Rand1:0000010_53	53	922.667	389.333		892	364					960.667	415.333		885.333	401.333		65.7536	27.7457		63.5681	25.9403		nan	nan		68.4616	29.5986		63.093	28.6009		2.83471	3.28127	2.79465		0.416	39.559	nan	39.559	34.3803	-17.8186		0.416	39.559	19.8955	-4042.61	12305	-70.5568
53	929m_mouse2_02-22-11_ForReAnalysis_Rand1:0000050_54	54	929.333	391.333					909.333	346		969.333	394		888	398		66.2286	27.8882		nan	nan		64.8033	24.6576		69.0792	28.0783		63.283	28.3633			2.85692	2.98365		0.424	nan	66.1939	-27.2661	3.81455	-9.16287		0.424	-27.2661	-14.5834	-2760.85	305068	-48.1859
8	929m_mouse2_02-22-11_ForReAnalysis_Rand1:0000004_55	55	926.667	384.667					904.667	344		970.667	368.667		888	393.333		66.0386	27.4132		nan	nan		64.4708	24.515		69.1743	26.2729		63.283	28.0307			3.33653	2.82395		0.432	nan	61.5875	-31.8725	-19.9831	-12.6323		0.432	-31.8725	-24.278	838.489	380087	14.6344
19	929m_mouse2_02-22-11_ForReAnalysis_Rand1:0000013_56	56	917.333	383.333					920	345.333		970.667	368		887.333	400.667		65.3734	27.3181		nan	nan		65.5635	24.61		69.1743	26.2254		63.2355	28.5534			3.95478	2.46916		0.44	nan	-85.9853	7.47468	-16.0394	-30.0193		0.44	7.47468	-1.16754	3320.55	123061	57.9545
41	929m_mouse2_02-22-11_ForReAnalysis_Rand1:0000037_57	57	930.667	367.333		889.333	346					970	384.667		886.667	410.667		66.3237	26.1779		63.378	24.6576		nan	nan		69.1267	27.4132		63.188	29.266		3.31484	3.06318	4.40104		0.448	27.2988	nan	27.2988	23.783	-44.5631		0.448	27.2988	28.8507	2807.46	-154665	48.9994
11	929m_mouse2_02-22-11_ForReAnalysis_Rand1:0000007_58	58	939.333	360.667		906.667	326.667					955.333	399.333		887.333	417.333		66.9412	25.7028		64.6133	23.2798		nan	nan		68.0815	28.4583		63.2355	29.7411		3.36009	2.98212	5.48091		0.456	46.1463	nan	46.1463	67.5202	-47.4587		0.456	46.1463	43.7518	845.909	-212579	14.7639
12	929m_mouse2_02-22-11_ForReAnalysis_Rand1:0000008_59	59	944	356.667		910.667	326.667					944	404		892	418.667		67.2738	25.4178		64.8984	23.2798		nan	nan		67.2738	28.7909		63.5681	29.8362		3.19588	3.37317	5.76672		0.464	41.9875	nan	41.9875	89.9983	-50.0131		0.464	41.9875	42.3853	-593.805	-109030	-10.3638
31	929m_mouse2_02-22-11_ForReAnalysis_Rand1:0000023_60	60	938	354.667		900.667	330.667					949.333	397.333		889.333	415.333		66.8463	25.2752		64.1857	23.5649		nan	nan		67.6539	28.3158		63.378	29.5986		3.16286	3.14601	5.54256		0.472	32.7355	nan	32.7355	75.1245	-51.263		0.472	32.7355	34.2509	-898.57	2403.36	-15.683
20	929m_mouse2_02-22-11_ForReAnalysis_Rand1:0000013_61	61	936	354		897.333	334					960	387.333		887.333	416.667		66.7037	25.2277		63.9481	23.8024		nan	nan		68.4141	27.6032		63.2355	29.6936		3.10238	2.92714	5.6545		0.48	27.3497	nan	27.3497	54.2458	-52.1672		0.48	27.3497	28.0082	-555.351	42203.7	-9.6927
50	929m_mouse2_02-22-11_ForReAnalysis_Rand1:0000049_62	62	932	352.667		893.333	332.667					960.667	383.333		884.667	414		66.4187	25.1327		63.6631	23.7074		nan	nan		68.4616	27.3181		63.0455	29.5036		3.10238	2.99159	5.52113		0.488	27.3497	nan	27.3497	46.9296	-52.3413		0.488	27.3497	25.3653	-223.31	30129.1	-3.8975
63	929m_mouse2_02-22-11_ForReAnalysis_Rand1:0000061_63	63	930.667	349.333		890	332.667					960	383.333		880.667	412.667		66.3237	24.8951		63.4255	23.7074		nan	nan		68.4141	27.3181		62.7604	29.4086		3.13205	3.20011	5.75049		0.496	22.2846	nan	22.2846	49.2145	-51.7101		0.496	22.2846	24.4352	-73.2848	13009.8	-1.27906
46	929m_mouse2_02-22-11_ForReAnalysis_Rand1:0000042_64	64	928	350		891.333	332					957.333	383.333		881.333	411.333		66.1336	24.9426		63.5205	23.6599		nan	nan		68.224	27.3181		62.8079	29.3135		2.91094	3.16427	5.49226		0.504	26.1466	nan	26.1466	48.6523	-52.7333		0.504	26.1466	24.1927	-15.1535	3633.21	-0.264479
																																														30			62.8016
Rand2																																												time4	data4	butfilt4	velocity	acceleration	ω
57	929m_mouse2_02-22-11_ForReAnalysis_Rand2:00000056_1	1	893.333	406		861.333	386.667		911	373		926	441		836.5	440		63.6631	28.9335		61.3826	27.5557		64.9221	26.5817		65.9911	31.4277		59.6129	31.3565		2.66435	3.41188	4.71963		0	31.1385	-61.837	31.1385	46.9746	-30.8897		0	31.1385	32.7627	650.442	58913.8	11.3524
60	929m_mouse2_02-22-11_ForReAnalysis_Rand2:00000060_2	2	898.667	402.667		870.667	377.333					916	444.5		830	438.5		64.0432	28.6959		62.0478	26.8905		nan	nan		65.2784	31.6771		59.1497	31.2496		2.69095	3.22699	5.51975		0.008	42.1383	nan	42.1383	67.4939	-27.5572		0.008	42.1383	43.1698	1593.06	55565	27.8042
43	929m_mouse2_02-22-11_ForReAnalysis_Rand2:00000041_3	3	900.667	401.333		878.667	366					907.5	439.5		829	437		64.1857	28.6009		62.6179	26.0829		nan	nan		64.6727	31.3208		59.0784	31.1427		2.9662	2.7632	5.70487		0.016	58.0917	nan	58.0917	79.8499	-26.4585		0.016	58.0917	58.2517	1539.48	-71536.9	26.869
46	929m_mouse2_02-22-11_ForReAnalysis_Rand2:00000043_4	4	904.667	403.333		890.667	363.333					896.5	449		827.5	430.5		64.4708	28.7434		63.4731	25.8928		nan	nan		63.8888	31.9978		58.9715	30.6794		3.02014	3.30608	5.83013		0.024	70.71	nan	70.71	79.8605	-19.3949		0.024	70.71	67.8015	448.473	-150142	7.82733
58	929m_mouse2_02-22-11_ForReAnalysis_Rand2:00000059_5	5	906.667	405.333		888.667	366					897	451					64.6133	28.8859		63.3306	26.0829		nan	nan		63.9244	32.1404		nan	nan		3.08263	3.32656			0.032	65.4097	nan	65.4097	78.0478			0.032	65.4097	65.4273	-862.787	-132046	-15.0585
52	929m_mouse2_02-22-11_ForReAnalysis_Rand2:00000050_6	6	901.333	406		874.667	374					911	445.5		827	407		64.2332	28.9335		62.3328	26.653		nan	nan		64.9221	31.7484		58.9359	29.0047		2.96848	2.89803	5.2978		0.04	50.1951	nan	50.1951	76.2481	-0.770752		0.04	50.1951	53.9969	-1664.26	-50703.3	-29.0469
31	929m_mouse2_02-22-11_ForReAnalysis_Rand2:00000031_7	7	893.333	404.667					918.5	377		925	435.5		827.5	398.5		63.6631	28.8385		nan	nan		65.4566	26.8668		65.9198	31.0358		58.9715	28.399			3.14976	4.71211		0.048	nan	-47.7091	45.7509	44.2355	5.35165		0.048	45.7509	38.7991	-1674.04	70202.5	-29.2175
62	929m_mouse2_02-22-11_ForReAnalysis_Rand2:00000062_8	8	890.667	400.667					902	367		928	426		833	396.5		63.4731	28.5534		nan	nan		64.2807	26.1541		66.1336	30.3587		59.3635	28.2564			3.21522	4.12033		0.056	nan	-71.3957	22.0643	34.1596	4.13299		0.056	22.0643	27.2122	-541.023	190245	-9.44263
9	929m_mouse2_02-22-11_ForReAnalysis_Rand2:00000006_9	9	889.333	401.333					907	364		927	425		833	404		63.378	28.6009		nan	nan		64.637	25.9403		66.0623	30.2875		59.3635	28.7909			3.17022	4.01905		0.064	nan	-64.6752	28.7848	32.142	-2.71056		0.064	28.7848	30.1427	1369.89	191829	23.909
49	929m_mouse2_02-22-11_ForReAnalysis_Rand2:0000046_10	10	896	398.667		876	375.333		919	371		920	437		830	414.5		63.8531	28.4109		62.4278	26.748		65.4922	26.4392		65.5635	31.1427		59.1497	29.5392		2.19013	3.22304	4.83691		0.072	49.3995	-50.2627	49.3995	57.9496	-13.49		0.072	49.3995	49.1304	2528.24	29881.2	44.1262
44	929m_mouse2_02-22-11_ForReAnalysis_Rand2:0000041_11	11	902.667	403.333		890	364.667					909.5	447.5		828.5	419		64.3283	28.7434		63.4255	25.9879		nan	nan		64.8152	31.8909		59.0428	29.8599		2.89962	3.18499	5.40212		0.08	71.8612	nan	71.8612	81.2056	-11.9278		0.08	71.8612	70.5946	1847.98	-167861	32.2534
4	929m_mouse2_02-22-11_ForReAnalysis_Rand2:0000003_12	12	910.667	404		902.667	360					908.5	449		827.5	417		64.8984	28.7909		64.3283	25.6553		nan	nan		64.7439	31.9978		58.9715	29.7174		3.18705	3.21063	5.99884		0.088	79.6952	nan	79.6952	87.243	-8.88413		0.088	79.6952	78.6982	-157.534	-244745	-2.74949
10	929m_mouse2_02-22-11_ForReAnalysis_Rand2:0000006_13	13	914.667	403.333		899.333	360.667					910	451		835.5	412		65.1834	28.7434		64.0907	25.7028		nan	nan		64.8508	32.1404		59.5416	29.361		3.23099	3.41322	5.67552		0.096	70.2318	nan	70.2318	84.4081	-6.24771		0.096	70.2318	68.074	-2067.93	-172709	-36.0922
20	929m_mouse2_02-22-11_ForReAnalysis_Rand2:0000013_14	14	914.667	398.667		880.667	368.667					922	441.5		841	410.5		65.1834	28.4109		62.7604	26.2729		nan	nan		65.706	31.4633		59.9336	29.2541		3.23136	3.09689	5.31715		0.104	41.4237	nan	41.4237	80.2852	-9.12537		0.104	41.4237	45.6113	-2920.87	-36342.6	-50.9788
12	929m_mouse2_02-22-11_ForReAnalysis_Rand2:0000007_15	15	904	396.667					917.5	360.5					843.5	411		64.4233	28.2683		nan	nan		65.3853	25.6909		nan	nan		60.1117	29.2898				4.43085		0.112	nan	-69.531	23.929		-13.3282		0.112	23.929	21.3401	-2649.41	101654	-46.241
22	929m_mouse2_02-22-11_ForReAnalysis_Rand2:0000017_16	16	904	391.333					905.5	353		941.5	400		848.5	420.5		64.4233	27.8882		nan	nan		64.5302	25.1564		67.0957	28.5059		60.4681	29.9668			2.74287	4.46811		0.12	nan	-87.7591	5.70088	13.0137	-27.7233		0.12	5.70088	3.22069	-1294.41	211317	-22.5918
50	929m_mouse2_02-22-11_ForReAnalysis_Rand2:0000047_17	17	898.667	391.333					895	349		942	388.5		860.5	436.5		64.0432	27.8882		nan	nan		63.7819	24.8714		67.1313	27.6863		61.3232	31.107			3.0947	4.21413		0.128	nan	85.0492	-8.41076	-3.74053	-49.8015		0.128	-8.41076	0.629507	731.663	203429	12.7699
27	929m_mouse2_02-22-11_ForReAnalysis_Rand2:0000025_18	18	895.333	381.333					905.5	346.5		941	390		869.5	445.5		63.8056	27.1756		nan	nan		64.5302	24.6932		67.06	27.7932		61.9646	31.7484			3.31254	4.92951		0.136	nan	-73.7286	19.7314	10.7462	-68.0708		0.136	19.7314	14.9273	1960.45	51002.6	34.2163
42	929m_mouse2_02-22-11_ForReAnalysis_Rand2:0000040_19	19	900.667	377.333					919	347		939	403		869.5	447		64.1857	26.8905		nan	nan		65.4922	24.7288		66.9175	28.7197		61.9646	31.8553			3.28762	5.43898		0.144	nan	-58.8516	34.6084	33.8055	-65.8976		0.144	34.6084	31.9967	1547.7	-95410.7	27.0125
21	929m_mouse2_02-22-11_ForReAnalysis_Rand2:0000013_20	20	912	373.333		886	354		932.5	353.5		935.5	412		871.5	445		64.9934	26.6055		63.1405	25.2277		66.4543	25.1921		66.6681	29.361		62.1072	31.7128		2.30898	3.22459	5.86643		0.152	36.6336	-44.0526	36.6336	58.7107	-60.5286		0.152	36.6336	39.6906	433.881	-109269	7.57265
38	929m_mouse2_02-22-11_ForReAnalysis_Rand2:0000036_21	21	917.333	376		889.333	350.667		938	357.5		935	419		865.5	435		65.3734	26.7955		63.378	24.9902		66.8463	25.4771		66.6325	29.8599		61.6796	31.0001		2.6909	3.31294	5.59673		0.16	42.1372	-41.8332	42.1372	67.6642	-48.6999		0.16	42.1372	38.9388	-200.594	-31771.7	-3.50103
28	929m_mouse2_02-22-11_ForReAnalysis_Rand2:0000028_22	22	919.333	376		888	354.667		937.5	357		942	417.5					65.516	26.7955		63.283	25.2752		66.8106	25.4415		67.1313	29.753		nan	nan		2.70135	3.36988			0.168	34.2489	-46.2839	34.2489	61.357			0.168	34.2489	36.4811	-74.4669	31757.6	-1.29969
24	929m_mouse2_02-22-11_ForReAnalysis_Rand2:0000022_23	23	919.333	376.667		889.333	355.333		936	354.5		946	416		853	409		65.516	26.843		63.378	25.3227		66.7037	25.2633		67.4164	29.6461		60.7888	29.1472		2.62341	3.38654	5.25887		0.176	35.4179	-53.0611	35.4179	55.8635	-25.9862		0.176	35.4179	37.7474	307.527	23617.2	5.36736
7	929m_mouse2_02-22-11_ForReAnalysis_Rand2:0000005_24	24	919.333	382.667		891.333	354		936.5	353.5		944.5	420		849	400.5		65.516	27.2706		63.5205	25.2277		66.7394	25.1921		67.3095	29.9312		60.5037	28.5415		2.85575	3.2086	5.17086		0.184	45.6744	-59.5199	45.6744	56.0152	-14.2276		0.184	45.6744	41.4015	303.408	-19035.3	5.29546
53	929m_mouse2_02-22-11_ForReAnalysis_Rand2:0000051_25	25	920	379.333		891.333	354.667		936.5	354		941	422		852.5	394.5		65.5635	27.033		63.5205	25.2752		66.7394	25.2277		67.06	30.0737		60.7531	28.1139		2.69509	3.38899	4.9303		0.192	40.7098	-56.9228	40.7098	63.7943	-12.6638		0.192	40.7098	42.6019	2.96201	-26872.1	0.0516968
5	929m_mouse2_02-22-11_ForReAnalysis_Rand2:0000004_26	26	920	378.667		892.667	354.667		936.5	355		941.5	422		851.5	392		65.5635	26.9856		63.6156	25.2752		66.7394	25.299		67.0957	30.0737		60.6819	27.9357		2.59221	3.44732	4.97324		0.2	41.2851	-55.1168	41.2851	63.6113	-11.0145		0.2	41.2851	41.4489	-126.546	-5297.18	-2.20864
6	929m_mouse2_02-22-11_ForReAnalysis_Rand2:0000004_27	27	919.333	378		893.333	355.333		939.5	355		942.5	421		850.5	392.5		65.516	26.938		63.6631	25.3227		66.9532	25.299		67.1669	30.0024		60.6106	27.9714		2.45816	3.48083	5.01302		0.208	41.0822	-48.7549	41.0822	61.6857	-11.8957		0.208	41.0822	40.5772	-81.7928	2409.56	-1.42755
63	929m_mouse2_02-22-11_ForReAnalysis_Rand2:0000064_28	28	920	374		894.667	353.333		939	355		943	421		852.5	391		65.5635	26.653		63.7581	25.1802		66.9175	25.299		67.2026	30.0024		60.7531	27.8645		2.32991	3.72899	4.96058		0.216	39.208	-45	39.208	63.9246	-14.1361		0.216	39.208	40.1402	-87.9928	-2472.42	-1.53576
33	929m_mouse2_02-22-11_ForReAnalysis_Rand2:0000032_29	29	920	374.667		894.667	352.667		939	353		944.5	419		853.5	395		65.5635	26.7005		63.7581	25.1327		66.9175	25.1564		67.3095	29.8599		60.8244	28.1495		2.3911	3.60973	4.95568		0.224	40.9721	-48.7522	40.9721	61.0734	-17.0015		0.224	40.9721	39.1693	-121.351	3972.21	-2.11798
35	929m_mouse2_02-22-11_ForReAnalysis_Rand2:0000034_30	30	922.667	374.667		894	353.333		940	352		943.5	419		853.5	396.5		65.7536	26.7005		63.7106	25.1802		66.9888	25.0852		67.2382	29.8599		60.8244	28.2564		2.54659	3.49083	5.1689		0.232	36.6566	-52.5956	36.6566	64.8302	-17.5186		0.232	36.6566	38.1986	-24.4374	15978.8	-0.426513
56	929m_mouse2_02-22-11_ForReAnalysis_Rand2:0000055_31	31	922.667	373.333		896	352		939.5	353		945	416		853.5	399.5		65.7536	26.6055		63.8531	25.0852		66.9532	25.1564		67.3451	29.6461		60.8244	28.4702		2.43369	3.432	5.27011		0.24	38.659	-50.3798	38.659	62.3713	-20.7224		0.24	38.659	38.7783	134.309	8197.85	2.34413
45	929m_mouse2_02-22-11_ForReAnalysis_Rand2:0000042_32	32	922	374.667		896	352		940.5	352.5		946.5	417		852.5	402		65.706	26.7005		63.8531	25.0852		67.0244	25.1208		67.452	29.7174		60.7531	28.6484		2.45816	3.48566	5.32216		0.248	41.0822	-50.1525	41.0822	59.9401	-21.4688		0.248	41.0822	40.3475	106.728	-17062.2	1.86276
23	929m_mouse2_02-22-11_ForReAnalysis_Rand2:0000018_33	33	922.667	374.667		896.667	352.667		939.5	355		945.5	416.5		859	411		65.7536	26.7005		63.9007	25.1327		66.9532	25.299		67.3807	29.6817		61.2163	29.2898		2.42719	3.39638	5.22403		0.256	40.2364	-49.4398	40.2364	61.3737	-29.7122		0.256	40.2364	40.4859	-138.687	-31238.6	-2.42054
17	929m_mouse2_02-22-11_ForReAnalysis_Rand2:0000012_34	34	924	374		898	353.333		939.5	356		948.5	416		861.5	417		65.8485	26.653		63.9957	25.1802		66.9532	25.3702		67.5945	29.6461		61.3945	29.7174		2.36694	3.46514	5.40638		0.264	38.4806	-49.2679	38.4806	59.7436	-34.528		0.264	38.4806	38.1285	-393.09	-21283.3	-6.86071
47	929m_mouse2_02-22-11_ForReAnalysis_Rand2:0000044_35	35	923.333	374		896.667	356		940	354.5		950	414.5		865	423.5		65.801	26.653		63.9007	25.3702		66.9888	25.2633		67.7014	29.5392		61.6439	30.1806		2.29277	3.4557	5.45209		0.272	34.02	-49.4789	34.02	56.6373	-40.3171		0.272	34.02	34.1965	-479.219	2087.47	-8.36395
13	929m_mouse2_02-22-11_ForReAnalysis_Rand2:0000009_36	36	922.667	376		892	358		936	353.5		953.5	414		868.5	433		65.7536	26.7955		63.5681	25.5127		66.7037	25.1921		67.9509	29.5036		61.8934	30.8576		2.53412	3.48737	5.60372		0.28	30.4108	-59.35	30.4108	50.9443	-46.4598		0.28	30.4108	30.461	-359.69	24315.5	-6.27778
59	929m_mouse2_02-22-11_ForReAnalysis_Rand2:0000059_37	37	918	374.667		890.667	360		934.5	357		954	413.5		876.5	441		65.421	26.7005		63.4731	25.6553		66.5968	25.4415		67.9865	29.4679		62.4635	31.4277		2.2106	3.77367	5.57612		0.288	28.2182	-46.9562	28.2182	47.168	-57.9686		0.288	28.2182	28.4414	-90.1709	41572.6	-1.57378
25	929m_mouse2_02-22-11_ForReAnalysis_Rand2:0000023_38	38	917.333	376.667		889.333	360.667		933	356.5		955.5	409.5		883	447		65.3734	26.843		63.378	25.7028		66.4899	25.4059		68.0934	29.1829		62.9267	31.8553		2.29822	3.58789	5.57756		0.296	29.7449	-52.1577	29.7449	40.7036	-63.9807		0.296	29.7449	29.0183	305.471	55739.4	5.33147
51	929m_mouse2_02-22-11_ForReAnalysis_Rand2:0000047_39	39	920.667	379.333		891.333	360.667		937	360.5		954.5	412		880.5	447.5		65.611	27.033		63.5205	25.7028		66.775	25.6909		68.0221	29.361		62.7485	31.8909		2.47782	3.35156	5.63853		0.304	32.4697	-49.0664	32.4697	43.9955	-59.4915		0.304	32.4697	33.329	801.659	48709.2	13.9916
8	929m_mouse2_02-22-11_ForReAnalysis_Rand2:0000005_40	40	928.667	382		898	355.333					951	418		881.5	447		66.1811	27.2231		63.9957	25.3227		nan	nan		67.7727	29.7886		62.8198	31.8553		2.89618	3.0191	5.72328		0.312	41.0091	nan	41.0091	58.1861	-54.0336		0.312	41.0091	41.8448	1084.82	-11765.8	18.9336
39	929m_mouse2_02-22-11_ForReAnalysis_Rand2:0000037_41	41	933.333	382		907.333	350					941.5	433		878.5	443		66.5137	27.2231		64.6608	24.9426		nan	nan		67.0957	30.8576		62.606	31.5702		2.93832	3.6808	5.84529		0.32	50.9061	nan	50.9061	80.9021	-48.0476		0.32	50.9061	50.6861	613.406	-114456	10.706
34	929m_mouse2_02-22-11_ForReAnalysis_Rand2:0000032_42	42	936	390		909.333	354.667					943.5	437.5		875.5	435		66.7037	27.7932		64.8033	25.2752		nan	nan		67.2382	31.1783		62.3922	31.0001		3.15466	3.42701	5.3734		0.328	52.9569	nan	52.9569	81.0274	-36.6419		0.328	52.9569	51.6593	-746.473	-186531	-13.0284
29	929m_mouse2_02-22-11_ForReAnalysis_Rand2:0000029_43	43	924	396		891.333	369.333					952	435.5		873.5	424.5		65.8485	28.2208		63.5205	26.3204		nan	nan		67.844	31.0358		62.2497	30.2518		3.00519	3.45045	4.13243		0.336	39.2257	nan	39.2257	54.6687	-29.4385		0.336	39.2257	38.7425	-2371.08	-155262	-41.3832
48	929m_mouse2_02-22-11_ForReAnalysis_Rand2:0000044_44	44										960	428		877.5	416		nan	nan		nan	nan		nan	nan		68.4141	30.5013		62.5347	29.6461						0.344	nan	nan					0.344	14.0003
36	929m_mouse2_02-22-11_ForReAnalysis_Rand2:0000034_45	45	916	405.333					910.5	365		967	411		882	421		65.2784	28.8859		nan	nan		64.8865	26.0116		68.9129	29.2898		62.8554	30.0024			3.65687	2.66786		0.352	nan	82.2348	-11.2252	6.34056	-24.74		0.352	-11.2252	-12.9482	-2424.02	207645	-42.3072
1	929m_mouse2_02-22-11_ForReAnalysis_Rand2:0000000_46	46	919.333	404.667					899.5	364		967	397		883.5	431.5		65.516	28.8385		nan	nan		64.1026	25.9403		68.9129	28.2921		62.9623	30.7507			3.44063	3.19025		0.36	nan	64.0018	-29.4582	-9.13748	-36.8271		0.36	-29.4582	-25.0624	91.6501	334264	1.5996
41	929m_mouse2_02-22-11_ForReAnalysis_Rand2:0000038_47	47	920	400.667					914.5	365.5		966	402.5		883.5	446.5		65.5635	28.5534		nan	nan		65.1715	26.0472		68.8417	28.684		62.9623	31.8197			3.28078	4.17547		0.368	nan	81.1111	-12.3489	2.2819	-51.4673		0.368	-12.3489	-11.4818	2924.2	254570	51.037
55	929m_mouse2_02-22-11_ForReAnalysis_Rand2:0000053_48	48	922	396								955.5	428.5		881.5	446.5		65.706	28.2208		nan	nan		nan	nan		68.0934	30.5369		62.8198	31.8197			3.32624	4.61325		0.376	nan	nan		44.1319	-51.2711		0.376	22.27
54	929m_mouse2_02-22-11_ForReAnalysis_Rand2:0000051_49	49	933.333	392.667		913.333	362					941.5	439		882	444		66.5137	27.9833		65.0884	25.7978		nan	nan		67.0957	31.2852		62.8554	31.6415		2.60917	3.35281	5.17352		0.384	56.8889	nan	56.8889	80.0033	-45		0.384	56.8889	55.1546	3139.56	-214964	54.7957
15	929m_mouse2_02-22-11_ForReAnalysis_Rand2:0000011_50	50	939.333	396		926	352.667					929.5	442.5		879	439.5		66.9412	28.2208		65.9911	25.1327		nan	nan		66.2405	31.5346		62.6416	31.3208		3.23098	3.38709	5.30064		0.392	72.8975	nan	72.8975	78.06	-35.7915		0.392	72.8975	71.9579	725.355	-309885	12.6598
18	929m_mouse2_02-22-11_ForReAnalysis_Rand2:0000012_51	51	939.333	395.333		920.667	353.333					931	442		876	425		66.9412	28.1733		65.611	25.1802		nan	nan		66.3474	31.499		62.4278	30.2875		3.2754	3.37831	4.98404		0.4	66.0383	nan	66.0383	79.8758	-25.0997		0.4	66.0383	66.7603	-1818.59	-270226	-31.7404
61	929m_mouse2_02-22-11_ForReAnalysis_Rand2:0000060_52	52	936	390		904	359.333					932.5	444		882	410.5		66.7037	27.7932		64.4233	25.6077		nan	nan		66.4543	31.6415		62.8554	29.2541		3.15861	3.85637	4.11627		0.408	43.7814	nan	43.7814	86.2916	-20.7882		0.408	43.7814	42.8604	-3598.27	-122145	-62.8016
30	929m_mouse2_02-22-11_ForReAnalysis_Rand2:0000030_53	53	921.333	390.667								962	414		884	401		65.6585	27.8408		nan	nan		nan	nan		68.5566	29.5036		62.998	28.5771			3.34127	2.76055		0.416	nan	nan		29.8454	-15.471		0.416	11.5845
26	929m_mouse2_02-22-11_ForReAnalysis_Rand2:0000023_54	54	928	388					915.5	347.5		967.5	399		887.5	396		66.1336	27.6507		nan	nan		65.2428	24.7645		68.9486	28.4346		63.2474	28.2208			2.92207	2.94199		0.424	nan	72.8476	-20.6124	15.5615	-11.1738		0.424	-20.6124	-17.5062	-1846	304562	-32.2188
11	929m_mouse2_02-22-11_ForReAnalysis_Rand2:0000006_55	55	920.667	386					904	344		969.5	369		889.5	396		65.611	27.5082		nan	nan		64.4233	24.515		69.0911	26.2967		63.3899	28.2208			3.68492	2.33263		0.432	nan	68.3552	-25.1048	-19.1943	-17.789		0.432	-25.1048	-20.348	1100.08	298891	19.2
3	929m_mouse2_02-22-11_ForReAnalysis_Rand2:0000002_56	56	916.667	380					917.5	345		972	367.5		886.5	403		65.326	27.0806		nan	nan		65.3853	24.5863		69.2693	26.1898		63.1761	28.7197			4.04265	2.70341		0.44	nan	-88.6366	4.82338	-12.7297	-37.3227		0.44	4.82338	0.0950639	2936.25	99118.6	51.2473
19	929m_mouse2_02-22-11_ForReAnalysis_Rand2:0000012_57	57	924.667	366								970.5	385.5					65.8961	26.0829		nan	nan		nan	nan		69.1624	27.4725		nan	nan			3.54961			0.448	nan	nan		23.0477			0.448	24.9117
40	929m_mouse2_02-22-11_ForReAnalysis_Rand2:0000037_58	58	938	358.667		907.333	328					953.5	399		887.5	418		66.8463	25.5603		64.6608	23.3748		nan	nan		67.9509	28.4346		63.2474	29.7886		3.09073	3.07926	5.55254		0.456	45	nan	45	68.9782	-49.598		0.456	45	43.0707	1066.08	-202525	18.6065
37	929m_mouse2_02-22-11_ForReAnalysis_Rand2:0000034_59	59	942.667	358		911.333	326					944	405		890	417		67.1788	25.5127		64.9458	23.2323		nan	nan		67.2738	28.8622		63.4255	29.7174		3.19169	3.35079	5.63614		0.464	45.6025	nan	45.6025	88.3754	-48.246		0.464	45.6025	43.6893	-554.426	-135552	-9.67657
14	929m_mouse2_02-22-11_ForReAnalysis_Rand2:0000010_60	60	939.333	356		900.667	332					953	396.5		890.5	416		66.9412	25.3702		64.1857	23.6599		nan	nan		67.9152	28.2564		63.4612	29.6461		3.24318	3.04613	5.51308		0.472	31.8279	nan	31.8279	71.3527	-50.8584		0.472	31.8279	34.1999	-1102.75	-2929.02	-19.2466
32	929m_mouse2_02-22-11_ForReAnalysis_Rand2:0000031_61	61	934.667	353.333		894	334					960.5	389		888.5	415.5		66.6087	25.1802		63.7106	23.8024		nan	nan		68.4497	27.722		63.3187	29.6105		3.20894	3.13846	5.51836		0.48	25.4263	nan	25.4263	54.0848	-53.4014		0.48	25.4263	26.0453	-601.291	69491.7	-10.4945
2	929m_mouse2_02-22-11_ForReAnalysis_Rand2:0000001_62	62	932	351.333		891.333	333.333					962	385		884.5	414		66.4187	25.0376		63.5205	23.7549		nan	nan		68.5566	27.4369		63.0336	29.5036		3.16932	3.21361	5.60387		0.488	23.8751	nan	23.8751	48.2964	-52.8388		0.488	23.8751	24.5792	9.11556	46838.5	0.159097
16	929m_mouse2_02-22-11_ForReAnalysis_Rand2:0000011_63	63	928.667	350		894.667	331.333					960.5	383.5		881	410.5		66.1811	24.9426		63.7581	23.6123		nan	nan		68.4497	27.33		62.7842	29.2541		2.76417	3.29331	5.48895		0.496	28.7681	nan	28.7681	46.4616	-51.766		0.496	28.7681	26.1911	148.126	2391.8	2.58528
64	929m_mouse2_02-22-11_ForReAnalysis_Rand2:0000064_64	64	927.333	348		890.667	330.667					957.5	383.5		878.5	409.5		66.0861	24.8001		63.4731	23.5649		nan	nan		68.2359	27.33		62.606	29.1829		2.89024	3.31997	5.59639		0.504	25.3014	nan	25.3014	49.643	-51.5493		0.504	25.3014	26.9493	47.3844	-6296.33	0.827013
																																	0.337932	0.238937												30			78.7719
Rand3																																												time5	data7	butfilt7	velocity	acceleration	ω
21	929m_mouse2_02-22-11_ForReAnalysis_Rand3:00000016_1	1	892	405		863	382		908.5	372.5		923	442.5		835	439.5		63.5681	28.8622		61.5014	27.2231		64.7439	26.5461		65.7773	31.5346		59.506	31.3208		2.63776	3.46734	4.7482		0	38.4181	-63.0834	38.4181	50.4206	-31.185		0	38.4181	39.4995	446.259	47243.5	7.78869
27	929m_mouse2_02-22-11_ForReAnalysis_Rand3:00000022_2	2	897.5	402		869.5	372		913.5	377		917.5	441.5		831	439.5		63.96	28.6484		61.9646	26.5105		65.1003	26.8668		65.3853	31.4633		59.2209	31.3208		2.92446	3.15522	5.44067		0.008	46.9749	-57.3808	46.9749	63.1456	-29.4191		0.008	46.9749	46.6396	1202.15	56339.1	20.9816
18	929m_mouse2_02-22-11_ForReAnalysis_Rand3:00000012_3	3	902.5	402		879.5	367.5								828.5	436		64.3164	28.6484		62.6773	26.1898		nan	nan		nan	nan		59.0428	31.0714		2.95491		5.80359		0.016	56.3099	nan	56.3099		-24.6769		0.016	56.3099	58.734	1347.68	-52961.1	23.5215
52	929m_mouse2_02-22-11_ForReAnalysis_Rand3:00000051_4	4	905	403		890.5	362.5					894	450		829	429		64.4945	28.7197		63.4612	25.8334		nan	nan		63.7106	32.0691		59.0784	30.5725		3.06562	3.43995	5.72429		0.024	70.3014	nan	70.3014	76.8274	-18.8861		0.024	70.3014	68.2026	354.776	-168381	6.19202
47	929m_mouse2_02-22-11_ForReAnalysis_Rand3:00000045_5	5	906	404.5		888.5	364.5					896	453		828	418		64.5658	28.8266		63.3187	25.976		nan	nan		63.8531	32.2829		59.0071	29.7886		3.11146	3.52904	5.64129		0.032	66.3706	nan	66.3706	78.3497	-9.8193		0.032	66.3706	64.4104	-1346.41	-162610	-23.4993
60	929m_mouse2_02-22-11_ForReAnalysis_Rand3:00000060_6	6	904	404		876	372.5					912	445.5		826	406		64.4233	28.7909		62.4278	26.5461		nan	nan		64.9934	31.7484		58.8646	28.9335		3.00349	3.01193	5.56047		0.04	48.3665	nan	48.3665	79.0889	-1.4688		0.04	48.3665	46.66	-2246.98	-9506.96	-39.2172
32	929m_mouse2_02-22-11_ForReAnalysis_Rand3:00000030_7	7	892.5	401.5		865.5	390.5		916.5	374		923	436		828	398.5		63.6037	28.6128		61.6796	27.8289		65.3141	26.653		65.7773	31.0714		59.0071	28.399		2.0777	3.28166	4.60154		0.048	22.1663	-48.8879	22.1663	48.5215	2.663		0.048	22.1663	28.4586	-1498.52	149096	-26.1541
1	929m_mouse2_02-22-11_ForReAnalysis_Rand3:00000001_8	8	888	399					902.5	365.5		929.5	424		831.5	394.5		63.283	28.4346		nan	nan		64.3164	26.0472		66.2405	30.2162		59.2566	28.1139			3.45266	4.0392		0.056	nan	-66.5953	26.8647	31.0652	4.55377		0.056	26.8647	22.6837	138.559	192223	2.41832
5	929m_mouse2_02-22-11_ForReAnalysis_Rand3:00000004_9	9	890.5	399.5					907	363.5		927	425		833.5	407.5		63.4612	28.4702		nan	nan		64.637	25.9047		66.0623	30.2875		59.3991	29.0404			3.17308	4.1019		0.064	nan	-65.3764	28.0836	34.9393	-7.98933		0.064	28.0836	30.6756	1577.05	135279	27.5246
23	929m_mouse2_02-22-11_ForReAnalysis_Rand3:0000020_10	10	897.5	398		875	372		918	367		919	438		829.5	412.5		63.96	28.3633		62.3566	26.5105		65.421	26.1541		65.4922	31.2139		59.114	29.3967		2.45035	3.23627	4.95494		0.072	49.1276	-56.5237	49.1276	61.742	-12.0372		0.072	49.1276	47.9164	2303.02	19278.3	40.1953
29	929m_mouse2_02-22-11_ForReAnalysis_Rand3:0000027_11	11	904.5	400		888	365					909.5	446.5		828.5	416.5		64.4589	28.5059		63.283	26.0116		nan	nan		64.8152	31.8197		59.0428	29.6817		2.75754	3.33291	5.54229		0.08	64.7595	nan	64.7595	83.8627	-12.2491		0.08	64.7595	67.5239	1885.5	-132791	32.9081
45	929m_mouse2_02-22-11_ForReAnalysis_Rand3:0000043_12	12	909.5	402.5		903.5	358.5					906.5	450		828.5	416.5		64.8152	28.684		64.3876	25.5484		nan	nan		64.6014	32.0691		59.0428	29.6817		3.16466	3.39182	5.85802		0.088	82.2348	nan	82.2348	86.3861	-9.80609		0.088	82.2348	78.0844	178.367	-239937	3.11309
41	929m_mouse2_02-22-11_ForReAnalysis_Rand3:0000039_13	13	911.5	402		897.5	361.5					909.5	450		834.5	412.5		64.9577	28.6484		63.96	25.7622		nan	nan		64.8152	32.0691		59.4704	29.3967		3.0538	3.42367	5.53816		0.096	70.9308	nan	70.9308	87.6141	-7.76517		0.096	70.9308	70.3778	-1953.49	-215713	-34.0949
42	929m_mouse2_02-22-11_ForReAnalysis_Rand3:0000039_14	14	912	398		881	367.5					918.5	445		838.5	409		64.9934	28.3633		62.7842	26.1898		nan	nan		65.4566	31.7128		59.7554	29.1472		3.09919	3.38132	5.29629		0.104	44.5342	nan	44.5342	82.1261	-8.51171		0.104	44.5342	46.8285	-3273.04	-74412.1	-57.1253
54	929m_mouse2_02-22-11_ForReAnalysis_Rand3:0000053_15	15	906.5	396.5					918	359					844.5	412.5		64.6014	28.2564		nan	nan		65.421	25.584		nan	nan		60.183	29.3967				4.56316		0.112	nan	-72.951	20.509		-14.4703		0.112	20.509	18.0092	-3144.09	113611	-54.8747
11	929m_mouse2_02-22-11_ForReAnalysis_Rand3:0000007_16	16	902	394.5					902	353		943.5	402.5		847	420.5		64.2807	28.1139		nan	nan		64.2807	25.1564		67.2382	28.684		60.3612	29.9668			3.01193	4.33545		0.12	nan	89.9981	-3.46194	10.9111	-25.3014		0.12	-3.46194	-3.47689	-1455.26	257603	-25.3991
40	929m_mouse2_02-22-11_ForReAnalysis_Rand3:0000038_17	17	902	384.5					896.5	348		942.5	388		860.5	437.5		64.2807	27.4013		nan	nan		63.8888	24.8001		67.1669	27.6507		61.3232	31.1783			2.89698	4.79715		0.128	nan	81.4309	-12.0291	4.93922	-51.9384		0.128	-12.0291	-5.27499	977.564	233245	17.0617
4	929m_mouse2_02-22-11_ForReAnalysis_Rand3:0000003_18	18	894.5	382					902	345		940.5	390.5		869.5	445.5		63.7462	27.2231		nan	nan		64.2807	24.5863		67.0244	27.8289		61.9646	31.7484			3.33367	4.86339		0.136	nan	-78.5412	14.9188	10.4692	-68.5104		0.136	14.9188	12.1641	2276.66	41769.3	39.7353
56	929m_mouse2_02-22-11_ForReAnalysis_Rand3:0000054_19	19	902.5	374.5					920	347		939.5	403		870.5	447.5		64.3164	26.6886		nan	nan		65.5635	24.7288		66.9532	28.7197		62.0359	31.8909			3.32833	5.6802		0.144	nan	-57.5288	35.9312	37.606	-66.3295		0.144	35.9312	31.1516	1645.87	-116544	28.7259
43	929m_mouse2_02-22-11_ForReAnalysis_Rand3:0000039_20	20	911	373		884.5	354		934.5	354		935	412.5		871.5	444.5		64.9221	26.5817		63.0336	25.2277		66.5968	25.2277		66.6325	29.3967		62.1072	31.6771		2.32376	3.29382	5.82128		0.152	35.6398	-38.9559	35.6398	58.7173	-61.0817		0.152	35.6398	38.4981	411.966	-110154	7.19017
59	929m_mouse2_02-22-11_ForReAnalysis_Rand3:0000056_21	21	920	375		889	351		937.5	356.5		935	419.5		865.5	435		65.5635	26.7242		63.3543	25.0139		66.8106	25.4059		66.6325	29.8955		61.6796	31.0001		2.7939	3.34659	5.77651		0.16	37.7468	-46.5911	37.7468	71.3721	-47.7501		0.16	37.7468	37.7431	-116.594	-24445.2	-2.03495
2	929m_mouse2_02-22-11_ForReAnalysis_Rand3:0000001_22	22	920.5	375.5		889	351.5		936.5	356.5		942.5	418		857	422		65.5991	26.7599		63.3543	25.0495		66.7394	25.4059		67.1669	29.7886		61.0738	30.0737		2.82216	3.41048	5.6089		0.168	37.3039	-49.8991	37.3039	62.6318	-36.2147		0.168	37.3039	36.6326	20.8431	22801	0.36378
24	929m_mouse2_02-22-11_ForReAnalysis_Rand3:0000021_23	23	918	376.5		887.5	354.5		936	354		945.5	416.5		849	407.5		65.421	26.8311		63.2474	25.2633		66.7037	25.2277		67.3807	29.6817		60.5037	29.0404		2.68002	3.45927	5.39074		0.176	35.8033	-51.3402	35.8033	55.4915	-24.1932		0.176	35.8033	38.0766	248.221	11343.3	4.33228
25	929m_mouse2_02-22-11_ForReAnalysis_Rand3:0000021_24	24	917.5	378		889.5	352		937.5	356.5		944.5	418.5		849.5	401		65.3853	26.938		63.3899	25.0852		66.8106	25.4059		67.3095	29.8243		60.5393	28.5771		2.72302	3.4688	5.11569		0.184	42.8789	-47.07	42.8789	56.3099	-18.6874		0.184	42.8789	40.6041	202.336	-15912.5	3.53143
9	929m_mouse2_02-22-11_ForReAnalysis_Rand3:0000006_25	25	919.5	378		890.5	352.5		937.5	357		942	422.5		849.5	395		65.5279	26.938		63.4612	25.1208		66.8106	25.4415		67.1313	30.1093		60.5393	28.1495		2.75201	3.5536	5.13353		0.192	41.3255	-49.3987	41.3255	63.178	-13.6504		0.192	41.3255	41.3139	-6.37831	-17137	-0.111322
16	929m_mouse2_02-22-11_ForReAnalysis_Rand3:0000010_26	26	922	378		891.5	353		937.5	355		942.5	422		850.5	393		65.706	26.938		63.5324	25.1564		66.8106	25.299		67.1669	30.0737		60.6106	28.007		2.81044	3.45927	5.20635		0.2	39.3405	-56.0235	39.3405	65.0188	-11.8483		0.2	39.3405	40.5021	-71.8565	-1885.15	-1.25413
10	929m_mouse2_02-22-11_ForReAnalysis_Rand3:0000006_27	27	920.5	376.5		892	352.5		938.5	356.5		941	423		851	390.5		65.5991	26.8311		63.5681	25.1208		66.8819	25.4059		67.06	30.145		60.6462	27.8289		2.65527	3.62155	5.05238		0.208	40.1009	-48.0128	40.1009	66.2092	-11.3892		0.208	40.1009	40.1642	-36.5407	2198.65	-0.637756
14	929m_mouse2_02-22-11_ForReAnalysis_Rand3:0000009_28	28	921.5	377.5		893.5	352.5		939	353		944	420.5		853	390.5		65.6704	26.9024		63.675	25.1208		66.9175	25.1564		67.2738	29.9668		60.7888	27.8289		2.67504	3.45854	4.96876		0.216	41.7603	-54.4623	41.7603	62.3789	-10.7459		0.216	41.7603	39.9174	-36.678	2277.9	-0.640153
50	929m_mouse2_02-22-11_ForReAnalysis_Rand3:0000048_29	29	923	374		893	351		940.5	355		944.5	419		854	394.5		65.7773	26.653		63.6393	25.0139		67.0244	25.299		67.3095	29.8599		60.86	28.1139		2.69396	3.55414	5.12969		0.224	37.4762	-47.3533	37.4762	64.4626	-16.5468		0.224	37.4762	39.5774	-0.0942518	2374.23	-0.001645
57	929m_mouse2_02-22-11_ForReAnalysis_Rand3:0000054_30	30	921.5	374.5		894	351.5		939	353		944.5	418.5		853	396.5		65.6704	26.6886		63.7106	25.0495		66.9175	25.1564		67.3095	29.8243		60.7888	28.2564		2.55487	3.5382	5.12722		0.232	39.9079	-50.856	39.9079	62.4027	-17.8054		0.232	39.9079	39.9159	1.30965	-7433.52	0.0228576
15	929m_mouse2_02-22-11_ForReAnalysis_Rand3:0000009_31	31	922.5	376		895.5	351.5		940	355		946	417.5		852.5	398.5		65.7417	26.7955		63.8175	25.0495		66.9888	25.299		67.4164	29.753		60.7531	28.399		2.59823	3.39873	5.23989		0.24	42.2208	-50.1944	42.2208	60.4786	-17.8189		0.24	42.2208	39.5983	-119.031	-11681.2	-2.07747
31	929m_mouse2_02-22-11_ForReAnalysis_Rand3:0000028_32	32	924	373		895.5	353		941	353.5		945.5	416.5		853.5	402.5		65.8485	26.5817		63.8175	25.1564		67.06	25.1921		67.3807	29.6817		60.8244	28.684		2.48125	3.45799	5.44627		0.248	35.0594	-48.9182	35.0594	63.699	-22.7064		0.248	35.0594	38.0114	-185.589	-4298.47	-3.23914
36	929m_mouse2_02-22-11_ForReAnalysis_Rand3:0000034_33	33	924.5	374		896.5	352.5		940.5	355		947.5	416		858	410		65.8842	26.653		63.8888	25.1208		67.0244	25.299		67.5233	29.6461		61.1451	29.2185		2.5158	3.41253	5.38897		0.256	37.5191	-49.8991	37.5191	61.294	-28.429		0.256	37.5191	36.6289	-187.806	-5773.1	-3.27783
44	929m_mouse2_02-22-11_ForReAnalysis_Rand3:0000039_34	34	924.5	373		896.5	352.5		941.5	355		948	415.5		860.5	417		65.8842	26.5817		63.8888	25.1208		67.0957	25.299		67.5589	29.6105		61.3232	29.7174		2.47305	3.46092	5.53484		0.264	36.2095	-46.6366	36.2095	61.06	-34.5085		0.264	36.2095	35.0065	-277.959	-10590.3	-4.8513
35	929m_mouse2_02-22-11_ForReAnalysis_Rand3:0000032_35	35	925	372		894.5	354		941.5	353		952	415		863.5	424.5		65.9198	26.5105		63.7462	25.2277		67.0957	25.1564		67.844	29.5748		61.537	30.2518		2.52387	3.61839	5.76253		0.272	30.5476	-49.0283	30.5476	57.875	-40.486		0.272	30.5476	32.1816	-357.251	1259.76	-6.2352
7	929m_mouse2_02-22-11_ForReAnalysis_Rand3:0000005_36	36	924	375		892	356		936	356		955	414		869.5	434		65.8485	26.7242		63.5681	25.3702		66.7037	25.3702		68.0578	29.5036		61.9646	30.9289		2.65216	3.55038	5.72395		0.28	30.6997	-57.7244	30.6997	51.5198	-47.2704		0.28	30.6997	29.2905	-257.803	25471.4	-4.49951
49	929m_mouse2_02-22-11_ForReAnalysis_Rand3:0000047_37	37	920.5	375.5		888.5	359		935.5	357.5		955.5	413		876	442.5		65.5991	26.7599		63.3187	25.584		66.6681	25.4771		68.0934	29.4323		62.4278	31.5346		2.56578	3.65557	5.73193		0.288	27.2768	-50.1944	27.2768	46.9749	-56.4087		0.288	27.2768	28.0567	50.2912	45432.9	0.877748
26	929m_mouse2_02-22-11_ForReAnalysis_Rand3:0000021_38	38	916.5	375.5		887	358.5		934.5	356		956.5	410		880.5	447		65.3141	26.7599		63.2118	25.5484		66.5968	25.3702		68.1646	29.2185		62.7485	31.8553		2.4264	3.7644	5.70485		0.296	29.9536	-47.2906	29.9536	40.7778	-63.2749		0.296	29.9536	30.0952	469.123	45542.1	8.18775
58	929m_mouse2_02-22-11_ForReAnalysis_Rand3:0000054_39	39	922	379		890.5	357		938	357		955	412.5		882.5	448		65.706	27.0093		63.4612	25.4415		66.8463	25.4415		68.0578	29.3967		62.8911	31.9266		2.73813	3.35114	5.66599		0.304	34.9309	-53.9726	34.9309	45.4308	-60.2104		0.304	34.9309	35.5627	778.965	30851.9	13.5955
17	929m_mouse2_02-22-11_ForReAnalysis_Rand3:0000011_40	40	925	380.5		898.5	354					950	421		880.5	446.5		65.9198	27.1162		64.0313	25.2277		nan	nan		67.7014	30.0024		62.7485	31.8197		2.67076	3.39182	5.67271		0.312	45	nan	45	58.3136	-56.0105		0.312	45	42.5586	962.754	17495.5	16.8032
28	929m_mouse2_02-22-11_ForReAnalysis_Rand3:0000025_41	41	936.5	383.5		907	350					939.5	430.5		877.5	444.5		66.7394	27.33		64.637	24.9426		nan	nan		66.9532	30.6794		62.5347	31.6771		3.18107	3.35626	6.04785		0.32	48.633	nan	48.633	86.3478	-45.9548		0.32	48.633	50.9668	1058.89	-42919.7	18.4812
1	929m_mouse2_02-22-11_ForReAnalysis_Rand3:0000062_42	42	936.5	388.5								968	387		885.5	410.5		66.7394	27.6863		nan	nan		nan	nan		68.9842	27.5794		63.1049	29.2541			2.24738	3.95824		0.328	nan	nan		87.2737	-23.334	*Calculation corrected manually	0.328	55.352	59.5009	276.039	-195497
62	929m_mouse2_02-22-11_ForReAnalysis_Rand3:0000063_43	43	927.5	394		905.5	352.5					943.5	438		875	434.5		66.098	28.0783		64.5302	25.1208		nan	nan		67.2382	31.2139		62.3566	30.9645		3.34735	3.33653	4.72528		0.336	62.071	nan	62.071	70.0169	-37.6476		0.336	62.071	55.3834	-2069.06	-283032	-36.1119
12	929m_mouse2_02-22-11_ForReAnalysis_Rand3:0000007_44	44	921.5	402.5		886.5	380.5		923	366.5		961.5	426		877.5	417.5		65.6704	28.684		63.1761	27.1162		65.7773	26.1185		68.521	30.3587		62.5347	29.753		2.94608	3.30614	3.31285		0.344	32.1523	-87.6141	32.1523	30.4342	-18.8247		0.344	32.1523	26.3959	-4252.47	-97441.4	-74.2196
38	929m_mouse2_02-22-11_ForReAnalysis_Rand3:0000036_45	45	922.5	402.5					910	365.5		968	414		880.5	418.5		65.7417	28.684		nan	nan		64.8508	26.0472		68.9842	29.5036		62.7485	29.8243			3.34451	3.20295		0.352	nan	71.3331	-22.1269	14.1843	-20.8545		0.352	-22.1269	-12.6561	-3628.12	242898	-63.3227
37	929m_mouse2_02-22-11_ForReAnalysis_Rand3:0000034_46	46	920.5	402					900.5	364		967	396.5		882.5	432.5		65.5991	28.6484		nan	nan		64.1738	25.9403		68.9129	28.2564		62.8911	30.822			3.33691	3.47246		0.36	nan	62.2415	-31.2185	-6.74558	-38.7516		0.36	-31.2185	-31.6541	-366.093	416980	-6.38953
8	929m_mouse2_02-22-11_ForReAnalysis_Rand3:0000005_47	47	919	399.5					911	364.5		967	403.5		883.5	446.5		65.4922	28.4702		nan	nan		64.9221	25.976		68.9129	28.7553		62.9623	31.8197			3.43256	4.19751		0.368	nan	77.125	-16.335	4.76364	-52.9356		0.368	-16.335	-18.5136	3043.56	304962	53.1202
55	929m_mouse2_02-22-11_ForReAnalysis_Rand3:0000053_48	48	926	398					930	362		959	430.5		880	448		65.9911	28.3633		nan	nan		66.2761	25.7978		68.3428	30.6794		62.7129	31.9266			3.30075	4.8418		0.376	nan	-83.6598	9.80019	44.5626	-47.3859		0.376	9.80019	17.0429	4513.3	18220.5	78.7719
30	929m_mouse2_02-22-11_ForReAnalysis_Rand3:0000027_49	49	929	390.5		911.5	357					940	438.5		880	443.5		66.2049	27.8289		64.9577	25.4415		nan	nan		66.9888	31.2496		62.7129	31.6059		2.69348	3.50938	5.14391		0.384	62.418	nan	62.418	77.0926	-47.2457		0.384	62.418	53.6991	3335.09	-238137	58.2083
20	929m_mouse2_02-22-11_ForReAnalysis_Rand3:0000015_50	50	940.5	394.5		925	351.5					927.5	444		877.5	437.5		67.0244	28.1139		65.9198	25.0495		nan	nan		66.098	31.6415		62.5347	31.1783		3.25739	3.64723	5.43577		0.392	70.1775	nan	70.1775	75.2849	-34.3151		0.392	70.1775	70.4044	703.105	-287123	12.2715
34	929m_mouse2_02-22-11_ForReAnalysis_Rand3:0000031_51	51	940.5	394.5		921	353.5					929	442.5		876	426.5		67.0244	28.1139		65.6348	25.1921		nan	nan		66.2049	31.5346		62.4278	30.3944		3.23549	3.51751	5.13118		0.4	64.5638	nan	64.5638	76.5268	-26.3871		0.4	64.5638	64.9488	-1258.88	-176781	-21.9715
22	929m_mouse2_02-22-11_ForReAnalysis_Rand3:0000016_52	52	936.5	389		902	354.5					930.5	445.5		878.5	414.5		66.7394	27.722		64.2807	25.2633		nan	nan		66.3118	31.7484		62.606	29.5392		3.47703	4.04909	4.51519		0.408	45	nan	45	83.9382	-23.7329		0.408	45	50.2624	-2125.39	-99314.7	-37.095
6	929m_mouse2_02-22-11_ForReAnalysis_Rand3:0000004_53	53	924.5	388.5		890.5	364					962	416.5		886	400		65.8842	27.6863		63.4612	25.9403		nan	nan		68.5566	29.6817		63.1405	28.5059		2.98653	3.33519	2.86347		0.416	35.7761	nan	35.7761	36.7475	-16.631		0.416	35.7761	30.9426	-2847.91	-52812.3	-49.7054
3	929m_mouse2_02-22-11_ForReAnalysis_Rand3:0000002_54	54	926.5	388		877.5	379.5		916	345.5		969.5	392.5		887.5	396.5		66.0267	27.6507		62.5347	27.0449		65.2784	24.6219		69.0911	27.9714		63.2474	28.2564		3.54412	3.08112	2.84457		0.424	9.84113	76.1225	9.84113	5.97432	-12.2953		0.424	9.84113	4.69578	-2970.38	105243	-51.843
46	929m_mouse2_02-22-11_ForReAnalysis_Rand3:0000043_55	55	922.5	383.5					905.5	343.5		971	368.5		890.5	397.5		65.7417	27.33		nan	nan		64.5302	24.4794		69.198	26.261		63.4612	28.3277			3.61787	2.48917		0.432	nan	66.9745	-26.4855	-17.1857	-23.6294		0.432	-26.4855	-16.5835	-1164.02	296401	-20.3159
13	929m_mouse2_02-22-11_ForReAnalysis_Rand3:0000008_56	56	922	379					918	345		972.5	368.5		885	403		65.706	27.0093		nan	nan		65.421	24.5863		69.3049	26.261		63.0692	28.7197			3.67583	3.14293		0.44	nan	83.2902	-10.1698	-11.7456	-32.9694		0.44	-10.1698	-13.9285	1772.04	274355	30.9279
63	929m_mouse2_02-22-11_ForReAnalysis_Rand3:0000064_57	57	926.5	365		899	362.5					951.5	435.5		872.5	424.5		66.0267	26.0116		64.0669	25.8334		nan	nan		67.8083	31.0358		62.1784	30.2518		1.96786	5.3307	5.72617		0.448	5.19443	nan	5.19443	70.475	-47.7743		0.448	5.19443	11.7691	3225.67	16848.6	56.2985
53	929m_mouse2_02-22-11_ForReAnalysis_Rand3:0000051_58	58	936	360		905.5	326.5					956	397.5		887.5	416.5		66.7037	25.6553		64.5302	23.2679		nan	nan		68.129	28.3277		63.2474	29.6817		3.22861	3.02875	5.30647		0.456	47.6838	nan	47.6838	61.9275	-49.357		0.456	47.6838	37.6822	2041.61	-208299	35.6329
39	929m_mouse2_02-22-11_ForReAnalysis_Rand3:0000036_59	59	940.5	357.5		908	327					943	405		890	416.5		67.0244	25.4771		64.7083	23.3035		nan	nan		67.2026	28.8622		63.4255	29.6817		3.17628	3.38976	5.53449		0.464	43.1817	nan	43.1817	86.9872	-49.4387		0.464	43.1817	44.4349	-107.124	-192261	-1.86967
33	929m_mouse2_02-22-11_ForReAnalysis_Rand3:0000030_60	60	936	354		902	331.5					949.5	397		889.5	416.5		66.7037	25.2277		64.2807	23.6242		nan	nan		67.6658	28.2921		63.3899	29.6817		2.90551	3.21185	5.55156		0.472	33.4952	nan	33.4952	72.5701	-53.3508		0.472	33.4952	35.9682	-1034.56	-32566.7	-18.0565
51	929m_mouse2_02-22-11_ForReAnalysis_Rand3:0000049_61	61	933	352.5		893.5	332.5					959.5	390		889	417		66.4899	25.1208		63.675	23.6955		nan	nan		68.3784	27.7932		63.3543	29.7174		3.15522	3.27236	5.56424		0.48	26.8544	nan	26.8544	54.7524	-55.6993		0.48	26.8544	27.8819	-628.191	59017.1	-10.964
61	929m_mouse2_02-22-11_ForReAnalysis_Rand3:0000060_62	62	929	350.5		893	332					962.5	384.5		882.5	412		66.2049	24.9783		63.6393	23.6599		nan	nan		68.5922	27.4013		62.8911	29.361		2.88446	3.40153	5.49455		0.488	27.1981	nan	27.1981	45.4244	-52.9072		0.488	27.1981	25.9171	-90.2871	42359.6	-1.57581
48	929m_mouse2_02-22-11_ForReAnalysis_Rand3:0000046_63	63	926.5	349		891.5	331.5					960	382.5		879.5	411		66.0267	24.8714		63.5324	23.6242		nan	nan		68.4141	27.2587		62.6773	29.2898		2.78867	3.37625	5.54446		0.496	26.5651	nan	26.5651	45	-52.8355		0.496	26.5651	26.4374	49.5635	6708.5	0.865046
19	929m_mouse2_02-22-11_ForReAnalysis_Rand3:0000014_64	64	928.5	348.5		891	330					959	384		878.5	411.5		66.1692	24.8357		63.4968	23.5173		nan	nan		68.3428	27.3656		62.606	29.3254		2.97994	3.33538	5.73182		0.504	26.2587	nan	26.2587	49.3323	-51.5627		0.504	26.2587	26.7101	17.049	-2032.16	0.297561
																																														30			81.1643
Rand4																																												time10	data10	butfilt10	velocity	acceleration	ω
60	929m_mouse2_02-22-11_ForReAnalysis_Rand4:00000058_1	1	892.667	408		862.667	384.667		910	373.333		923.333	442		836	438		63.6156	29.076		61.4777	27.4132		64.8508	26.6055		65.801	31.499		59.5773	31.2139		2.70846	3.26296	4.56936		0	37.8746	-63.4356	37.8746	47.9514	-27.8971		0	37.8746	38.818	392.054	43427.7	6.84264
41	929m_mouse2_02-22-11_ForReAnalysis_Rand4:00000042_2	2	896	404		868	375.333		916.667	377.333		918	442		830.667	437.333		63.8531	28.7909		61.8577	26.748		65.326	26.8905		65.421	31.499		59.1972	31.1664		2.85575	3.12916	5.22691		0.008	45.6744	-52.2242	45.6744	59.9314	-27.0307		0.008	45.6744	45.0909	1086.9	56545.1	18.9699
23	929m_mouse2_02-22-11_ForReAnalysis_Rand4:00000022_3	3	903.333	403.333		876.667	367.333					909.333	446		830	436		64.3757	28.7434		62.4754	26.1779		nan	nan		64.8033	31.784		59.1497	31.0714		3.19269	3.07057	5.72112		0.016	53.4718	nan	53.4718	81.9953	-24.0111		0.016	53.4718	56.2084	1296.78	-34441.8	22.633
13	929m_mouse2_02-22-11_ForReAnalysis_Rand4:00000011_4	4	906.667	403.333		890.667	363.333					896	450		828	426		64.6133	28.7434		63.4731	25.8928		nan	nan		63.8531	32.0691		59.0071	30.3587		3.07018	3.41148	5.83426		0.024	68.1986	nan	68.1986	77.1247	-16.0737		0.024	68.1986	65.8393	535.828	-136868	9.35196
24	929m_mouse2_02-22-11_ForReAnalysis_Rand4:00000022_5	5	904	403.333		887.333	364.667					898	452		828.667	420		64.4233	28.7434		63.2355	25.9879		nan	nan		63.9957	32.2116		59.0547	29.9312		3.00061	3.4945	5.4984		0.032	66.6815	nan	66.6815	82.9717	-12.4754		0.032	66.6815	64.7816	-893.114	-150061	-15.5878
47	929m_mouse2_02-22-11_ForReAnalysis_Rand4:00000049_6	6	900	405.333		872.667	372.667					911.333	444.667		827.333	411.333		64.1382	28.8859		62.1903	26.558		nan	nan		64.9458	31.689		58.9596	29.3135		3.03537	2.91715	5.19621		0.04	50.0794	nan	50.0794	73.9271	-4.72012		0.04	50.0794	51.5495	-1865.14	-44087.5	-32.5529
56	929m_mouse2_02-22-11_ForReAnalysis_Rand4:00000054_7	7	891.333	405.333		864.667	386		918	376.667		924	438.667		830	398.667		63.5205	28.8859		61.6202	27.5082		65.421	26.843		65.8485	31.2615		59.1497	28.4109		2.34724	3.32607	4.39662		0.048	35.9423	-47.069	35.9423	45.579	6.20287		0.048	35.9423	34.9393	-1598.51	100483	-27.8993
61	929m_mouse2_02-22-11_ForReAnalysis_Rand4:00000060_8	8	888.667	404.667					902.667	366.667		928	426		835.333	398		63.3306	28.8385		nan	nan		64.3283	26.1304		66.1336	30.3587		59.5297	28.3633			3.18879	3.83041		0.056	nan	-69.7751	23.6849	28.474	7.12528		0.056	23.6849	25.9732	-257.409	188530	-4.49264
43	929m_mouse2_02-22-11_ForReAnalysis_Rand4:00000045_9	9	888	402					907.333	366		927.333	426		834	404.667		63.283	28.6484		nan	nan		64.6608	26.0829		66.0861	30.3587		59.4347	28.8385			3.28366	3.85298		0.064	nan	-61.763	31.697	31.3905	-2.82748		0.064	31.697	30.8208	1417.97	172100	24.7482
38	929m_mouse2_02-22-11_ForReAnalysis_Rand4:0000038_10	10	896	400.667		872.667	375.333		920.667	372		921.333	438.667		831.333	412.667		63.8531	28.5534		62.1903	26.748		65.611	26.5105		65.6585	31.2615		59.2447	29.4086		2.45449	3.25467	4.68715		0.072	47.3545	-49.2891	47.3545	56.3103	-10.5126		0.072	47.3545	48.6608	2496.18	39803.5	43.5666
3	929m_mouse2_02-22-11_ForReAnalysis_Rand4:0000002_11	11	906	402.667		890.667	363.333					910.667	447.333		828	417.333		64.5658	28.6959		63.4731	25.8928		nan	nan		64.8984	31.879		59.0071	29.7411		3.00857	3.20044	5.65605		0.08	68.7034	nan	68.7034	84.035	-10.6487		0.08	68.7034	70.7597	2054.82	-154981	35.8635
58	929m_mouse2_02-22-11_ForReAnalysis_Rand4:0000057_12	12	904	405.333		902	358					906.667	449.333		830.667	416.667		64.4233	28.8859		64.2807	25.5127		nan	nan		64.6133	32.0216		59.1972	29.6936		3.37618	3.1414	5.2881		0.088	87.5805	nan	87.5805	86.5313	-8.78585		0.088	87.5805	81.538	16.4796	-268211	0.287623
30	929m_mouse2_02-22-11_ForReAnalysis_Rand4:0000028_13	13	913.333	402.667		898.667	360.667					909.333	448		834	411.333		65.0884	28.6959		64.0432	25.7028		nan	nan		64.8033	31.9266		59.4347	29.3135		3.17035	3.24319	5.68727		0.096	70.7513	nan	70.7513	84.9575	-6.23403		0.096	70.7513	71.0234	-2236.55	-205892	-39.0352
10	929m_mouse2_02-22-11_ForReAnalysis_Rand4:0000010_14	14	913.333	399.333		880	370		931.333	376.667		922.667	443.333		839.333	409.333		65.0884	28.4583		62.7129	26.3679		66.3711	26.843		65.7536	31.594		59.8148	29.171		3.16427	3.20542	5.32152		0.104	41.3477	-51.5455	41.3477	78.023	-7.69605		0.104	41.3477	45.7531	-3277.8	-42008.7	-57.2083
48	929m_mouse2_02-22-11_ForReAnalysis_Rand4:0000049_15	15	904	398		875.333	385.333		918	359.333					846.667	411.333		64.4233	28.3633		62.3803	27.4606		65.421	25.6077		nan	nan		60.3374	29.3135		2.2335		4.19485		0.112	23.8391	-70.0964	23.8391		-13.0917		0.112	23.8391	18.5787	-2908.69	111088	-50.7663
33	929m_mouse2_02-22-11_ForReAnalysis_Rand4:0000035_16	16	904	393.333					903.333	352		942.667	398		849.333	422		64.4233	28.0307		nan	nan		64.3757	25.0852		67.1788	28.3633		60.5274	30.0737			2.77559	4.39899		0.12	nan	89.0755	-4.38451	6.88215	-27.6722		0.12	-4.38451	-0.785998	-1500.38	200033	-26.1866
32	929m_mouse2_02-22-11_ForReAnalysis_Rand4:0000032_17	17	898	386.667					894.667	347.333		942	386		860	439.333		63.9957	27.5557		nan	nan		63.7581	24.7526		67.1313	27.5082		61.2876	31.3089			3.13601	4.6282		0.128	nan	85.1566	-8.30344	-0.868485	-54.1885		0.128	-8.30344	-5.42742	291.829	194674	5.09337
51	929m_mouse2_02-22-11_ForReAnalysis_Rand4:0000052_18	18	898.667	383.333					903.333	345.333		940	391.333		869.333	445.333		64.0432	27.3181		nan	nan		64.3757	24.61		66.9888	27.8882		61.9527	31.7365			3.00025	4.88799		0.136	nan	-82.9997	10.4603	10.9541	-64.6798		0.136	10.4603	3.88326	1614.4	109588	28.1766
17	929m_mouse2_02-22-11_ForReAnalysis_Rand4:0000014_19	19	902	376.667		872.667	370		922	347.333		939.333	399.333		870.667	446.667		64.2807	26.843		62.1903	26.3679		65.706	24.7526		66.9412	28.4583		62.0478	31.8316		2.14372	3.11248	5.46547		0.144	12.805	-55.7137	12.805	31.2632	-65.886		0.144	12.805	20.4029	2045.24	-8377.46	35.6962
57	929m_mouse2_02-22-11_ForReAnalysis_Rand4:0000054_20	20	909.333	376.667		885.333	355.333		934.667	355.333		934.667	413.333		870.667	444		64.8033	26.843		63.093	25.3227		66.6087	25.3227		66.6087	29.456		62.0478	31.6415		2.28841	3.17604	5.53337		0.152	41.6344	-40.101	41.6344	55.3579	-60.1334		0.152	41.6344	36.6071	1480.36	-107987	25.8371
42	929m_mouse2_02-22-11_ForReAnalysis_Rand4:0000042_21	21	916.667	378		888.667	350		937.333	360		936	420.667		866.667	434.667		65.326	26.938		63.3306	24.9426		66.7987	25.6553		66.7037	29.9787		61.7627	30.9764		2.82194	3.33823	5.38562		0.16	45	-41.0557	45	65.6241	-48.5765		0.16	45	44.0887	317.443	-114646	5.54043
50	929m_mouse2_02-22-11_ForReAnalysis_Rand4:0000051_22	22	920	380		889.333	353.333		936.667	355.333		942	418		857.333	424		65.5635	27.0806		63.378	25.1802		66.7513	25.3227		67.1313	29.7886		61.0975	30.2162		2.89618	3.12916	5.45682		0.168	41.0091	-55.9539	41.0091	59.9314	-35.0736		0.168	41.0091	41.6862	-353.977	-25572.2	-6.17807
18	929m_mouse2_02-22-11_ForReAnalysis_Rand4:0000014_23	23	920	378		890	356		936.667	354.667		945.333	418		852.667	406.667		65.5635	26.938		63.4255	25.3702		66.7513	25.2752		67.3688	29.7886		60.765	28.981		2.6512	3.37418	5.21525		0.176	36.2538	-54.4614	36.2538	57.6529	-23.0619		0.176	36.2538	38.425	-91.7128	42840.6	-1.60069
45	929m_mouse2_02-22-11_ForReAnalysis_Rand4:0000048_24	24	920.667	380.667		890	354.667		938	356		944.667	418		851.333	401.333		65.611	27.1281		63.4255	25.2752		66.8463	25.3702		67.3214	29.7886		60.67	28.6009		2.86522	3.16286	5.15588		0.184	40.2918	-54.9051	40.2918	57.2645	-16.5974		0.184	40.2918	40.2188	331.472	25871.5	5.78527
39	929m_mouse2_02-22-11_ForReAnalysis_Rand4:0000038_25	25	918.667	381.333		891.333	352.667		937.333	358.667		940	420		852	395.333		65.4685	27.1756		63.5205	25.1327		66.7987	25.5603		66.9888	29.9312		60.7175	28.1733		2.82273	3.14715	4.85463		0.192	46.3626	-50.5277	46.3626	61.114	-11.8597		0.192	46.3626	43.7286	322.231	-12615.9	5.62399
11	929m_mouse2_02-22-11_ForReAnalysis_Rand4:0000010_26	26	918	378		892.667	354		936.667	360		941.333	422		851.333	390.667		65.421	26.938		63.6156	25.2277		66.7513	25.6553		67.0838	30.0737		60.67	27.8408		2.48688	3.54926	4.836		0.2	43.4522	-43.9579	43.4522	62.0632	-10.7582		0.2	43.4522	45.3745	129.617	-22193.8	2.26225
14	929m_mouse2_02-22-11_ForReAnalysis_Rand4:0000011_27	27	919.333	378.667		894	353.333		939.333	355.333		943.333	422		852.667	391.333		65.516	26.9856		63.7106	25.1802		66.9412	25.3227		67.2263	30.0737		60.765	27.8882		2.5532	3.53012	4.83592		0.208	45.0011	-49.3995	45.0011	61.0201	-10.7575		0.208	45.0011	45.8025	-32.8694	-22427.3	-0.573679
54	929m_mouse2_02-22-11_ForReAnalysis_Rand4:0000053_28	28	919.333	378.667		894.667	351.333		940.667	354		944	420.667		854	392.667		65.516	26.9856		63.7581	25.0376		67.0363	25.2277		67.2738	29.9787		60.86	27.9833		2.62382	3.47115	4.76163		0.216	47.9371	-49.1441	47.9371	59.5739	-12.0948		0.216	47.9371	44.8486	-229.219	-17009.6	-4.00063
27	929m_mouse2_02-22-11_ForReAnalysis_Rand4:0000024_29	29	920	374		894	352.667		942	352.667		943.333	419.333		856	394		65.5635	26.653		63.7106	25.1327		67.1313	25.1327		67.2263	29.8836		61.0026	28.0783		2.39676	3.63346	4.77845		0.224	39.3689	-44.1181	39.3689	62.765	-17.354		0.224	39.3689	42.135	-305.023	6079.57	-5.32366
5	929m_mouse2_02-22-11_ForReAnalysis_Rand4:0000005_30	30	922	375.333		896	352.667		939.333	352.667		945.333	418.667		856	397.333		65.706	26.748		63.8531	25.1327		66.9412	25.1327		67.3688	29.8362		61.0026	28.3158		2.45811	3.5074	4.95789		0.232	41.0809	-52.5944	41.0809	61.7	-18.4349		0.232	41.0809	39.9682	-131.946	23879.7	-2.30289
29	929m_mouse2_02-22-11_ForReAnalysis_Rand4:0000027_31	31	922.667	375.333		894.667	352		940.667	354		944	416.667		854	400		65.7536	26.748		63.7581	25.0852		67.0363	25.2277		67.2738	29.6936		60.86	28.5059		2.59743	3.31484	5.19969		0.24	39.8052	-49.8436	39.8052	62.7012	-19.7596		0.24	39.8052	40.0238	77.0529	11793.1	1.34483
8	929m_mouse2_02-22-11_ForReAnalysis_Rand4:0000006_32	32	924.667	376		896.667	352.667		940.667	352.667		946.667	418		854	402		65.8961	26.7955		63.9007	25.1327		67.0363	25.1327		67.4639	29.7886		60.86	28.6484		2.59743	3.37888	5.3661		0.248	39.8052	-55.5606	39.8052	62.354	-20.1997		0.248	39.8052	41.2011	56.7432	-16318.3	0.990356
44	929m_mouse2_02-22-11_ForReAnalysis_Rand4:0000045_33	33	922.667	377.333		896.667	352		942	355.333		946.667	416		860	409.333		65.7536	26.8905		63.9007	25.0852		67.1313	25.3227		67.4639	29.6461		61.2876	29.171		2.58698	3.24324	5.0145		0.256	44.2556	-48.6919	44.2556	58.1728	-27.0505		0.256	44.2556	40.9317	-184.039	-27747.7	-3.21209
2	929m_mouse2_02-22-11_ForReAnalysis_Rand4:0000001_34	34	925.333	372.667		896	352		942	354.667		949.333	415.333		862	417.333		65.9435	26.558		63.8531	25.0852		67.1313	25.2752		67.6539	29.5986		61.4301	29.7411		2.55715	3.48861	5.52295		0.264	35.1672	-47.202	35.1672	60.6419	-35.1936		0.264	35.1672	38.2564	-387.22	-15534.5	-6.75826
35	929m_mouse2_02-22-11_ForReAnalysis_Rand4:0000036_35	35	924	374.667		896.667	354.667		940.667	356.667		950.667	415.333		864	426		65.8485	26.7005		63.9007	25.2752		67.0363	25.4178		67.749	29.5986		61.5727	30.3587		2.41365	3.46558	5.62724		0.272	36.1935	-47.202	36.1935	56.7449	-40.5486		0.272	36.1935	34.7362	-432.592	935.552	-7.55015
22	929m_mouse2_02-22-11_ForReAnalysis_Rand4:0000019_36	36	920	374.667		892.667	358		937.333	356.667		954.667	414		871.333	433.333		65.5635	26.7005		63.6156	25.5127		66.7987	25.4178		68.034	29.5036		62.0953	30.8813		2.28145	3.73639	5.43211		0.28	31.3738	-46.0815	31.3738	48.608	-50.3222		0.28	31.3738	31.335	-372.251	17402.1	-6.49701
31	929m_mouse2_02-22-11_ForReAnalysis_Rand4:0000029_37	37	918.667	376		889.333	360		934	357.333		952	412.667		875.333	441.333		65.4685	26.7955		63.378	25.6553		66.5612	25.4652		67.844	29.4086		62.3803	31.4514		2.38122	3.53142	5.587		0.288	28.6099	-50.6005	28.6099	47.7269	-56.4445		0.288	28.6099	28.7802	-154.158	38477.8	-2.69056
6	929m_mouse2_02-22-11_ForReAnalysis_Rand4:0000005_38	38	921.333	378		888.667	360.667		934	359.333		956.667	410		881.333	446.667		65.6585	26.938		63.3306	25.7028		66.5612	25.6077		68.1766	29.2185		62.8079	31.8316		2.63535	3.39723	5.66326		0.296	27.951	-55.8401	27.951	42.1654	-59.7783		0.296	27.951	28.8684	243.394	56055.3	4.24802
36	929m_mouse2_02-22-11_ForReAnalysis_Rand4:0000036_39	39	922	380.667		891.333	359.333		938.667	358		954.667	412.667		882	448.667		65.706	27.1281		63.5205	25.6077		66.8938	25.5127		68.034	29.4086		62.8554	31.9741		2.66229	3.25886	5.62224		0.304	34.825	-53.673	34.825	44.4091	-59.5345		0.304	34.825	32.6745	742.726	54390.6	12.963
1	929m_mouse2_02-22-11_ForReAnalysis_Rand4:0000000_40	40	930	378.667		898	354					953.333	418		880	447.333		66.2761	26.9856		63.9957	25.2277		nan	nan		67.939	29.7886		62.7129	31.879		2.87936	3.25915	6.05331		0.312	37.6266	nan	37.6266	59.3229	-53.9393		0.312	37.6266	40.7521	1113.64	-3109.64	19.4367
34	929m_mouse2_02-22-11_ForReAnalysis_Rand4:0000035_41	41	933.333	384		904.667	350					940	430.667		878.667	444		66.5137	27.3656		64.4708	24.9426		nan	nan		66.9888	30.6913		62.6179	31.6415		3.16927	3.35948	5.78447		0.32	49.8652	nan	49.8652	81.8696	-47.6633		0.32	49.8652	50.4928	692.972	-125258	12.0946
7	929m_mouse2_02-22-11_ForReAnalysis_Rand4:0000005_42	42	934.667	390		909.333	352.667					942.667	437.333		876	436.667		66.6087	27.7932		64.8033	25.1327		nan	nan		67.1788	31.1664		62.4278	31.1189		3.21526	3.42101	5.3423		0.328	55.8394	nan	55.8394	80.4068	-38.5007		0.328	55.8394	51.8396	-890.483	-213506	-15.5419
16	929m_mouse2_02-22-11_ForReAnalysis_Rand4:0000013_43	43	930	393.333		897.333	369.333					952	436.667		873.333	421.333		66.2761	28.0307		63.9481	26.3204		nan	nan		67.844	31.1189		62.2378	30.0262		2.88875	3.46337	4.50444		0.336	36.3042	nan	36.3042	63.0838	-26.2947		0.336	36.3042	36.2451	-2723.12	-158624	-47.5275
62	929m_mouse2_02-22-11_ForReAnalysis_Rand4:0000060_44	44	921.333	403.333					923.333	366		961.333	426		879.333	416.667		65.6585	28.7434		nan	nan		65.801	26.0829		68.5091	30.3587		62.6654	29.6936			3.27646	3.14034		0.344	nan	-86.9335	6.52651	29.5391	-17.6134		0.344	6.52651	8.26965	-3428.47	26538.8	-59.8381
52	929m_mouse2_02-22-11_ForReAnalysis_Rand4:0000052_45	45	920	410.667					910	365.333		966.667	411.333		882	420.667		65.5635	29.266		nan	nan		64.8508	26.0353		68.8892	29.3135		62.8554	29.9787			3.32605	2.80026		0.352	nan	77.5606	-15.8994	0.817631	-14.7436		0.352	-15.8994	-18.6105	-2298.5	249399	-40.1164
40	929m_mouse2_02-22-11_ForReAnalysis_Rand4:0000040_46	46	920.667	408.667					899.333	366		964.667	397.333		884	433.333		65.611	29.1235		nan	nan		64.0907	26.0829		68.7467	28.3158		62.998	30.8813			3.238	3.14929		0.36	nan	63.4344	-30.0256	-14.4448	-33.9288		0.36	-30.0256	-28.5064	561.917	372233	9.8073
64	929m_mouse2_02-22-11_ForReAnalysis_Rand4:0000063_47	47	921.333	403.333					910.667	362.667		966	402		884.667	446.667		65.6585	28.7434		nan	nan		64.8984	25.8453		68.8417	28.6484		63.0455	31.8316			3.1846	4.04532		0.368	nan	75.3033	-18.1567	-1.70937	-49.7646		0.368	-18.1567	-9.61982	3657.22	255528	63.8305
55	929m_mouse2_02-22-11_ForReAnalysis_Rand4:0000053_48	48	924.667	402		891.333	375.333					958.667	427.333		882	447.333		65.8961	28.6484		63.5205	26.748		nan	nan		68.3191	30.4537		62.8554	31.879		3.04216	3.02162	4.43651		0.376	38.6596	nan	38.6596	36.6894	-46.7353		0.376	38.6596	30.0091	4650.37	-44373.8	81.1643
20	929m_mouse2_02-22-11_ForReAnalysis_Rand4:0000015_49	49	932.667	395.333		913.333	358.667					938.667	438		880.667	445.333		66.4662	28.1733		65.0884	25.5603		nan	nan		66.8938	31.2139		62.7604	31.7365		2.954	3.07057	5.14094		0.384	62.1973	nan	62.1973	81.9953	-43.8767		0.384	62.1973	64.7861	2947.24	-278965	51.439
49	929m_mouse2_02-22-11_ForReAnalysis_Rand4:0000049_50	50	936	399.333		929.333	354					926	444.667		879.333	438.667		66.7037	28.4583		66.2286	25.2277		nan	nan		65.9911	31.689		62.6654	31.2615		3.26539	3.30838	4.91587		0.392	81.6336	nan	81.6336	77.5606	-34.7655		0.392	81.6336	77.165	186.927	-315331	3.2625
4	929m_mouse2_02-22-11_ForReAnalysis_Rand4:0000004_51	51	941.333	397.333		918.667	353.333					930.667	442		878.667	425.333		67.0838	28.3158		65.4685	25.1802		nan	nan		66.3237	31.499		62.6179	30.3112		3.52724	3.27267	4.89139		0.4	62.7454	nan	62.7454	76.5699	-24.0757		0.4	62.7454	67.777	-2098.06	-232539	-36.6181
25	929m_mouse2_02-22-11_ForReAnalysis_Rand4:0000022_52	52	933.333	390		902	356.667					936	440		880	411.333		66.5137	27.7932		64.2807	25.4178		nan	nan		66.7037	31.3565		62.7129	29.3135		3.26019	3.5683	4.09354		0.408	46.7715	nan	46.7715	86.9467	-21.8012		0.408	46.7715	43.596	-3533.7	-106874	-61.6746
53	929m_mouse2_02-22-11_ForReAnalysis_Rand4:0000052_53	53				890	368					960	416		885.333	399.333		nan	nan		63.4255	26.2254		nan	nan		68.4141	29.6461		63.093	28.4583						0.416	#VALUE!	nan					0.416	12.979
19	929m_mouse2_02-22-11_ForReAnalysis_Rand4:0000014_54	54	928	390.667					914.667	348		970	394		888	396		66.1336	27.8408		nan	nan		65.1834	24.8001		69.1267	28.0783		63.283	28.2208			3.00253	2.87581		0.424	nan	72.6465	-20.8135	4.53732	-7.59417		0.424	-20.8135	-17.3326	-2399.73	253100	-41.8832
28	929m_mouse2_02-22-11_ForReAnalysis_Rand4:0000024_55	55	923.333	386.667					904	343.333		966.667	368		885.333	396		65.801	27.5557		nan	nan		64.4233	24.4675		68.8892	26.2254		63.093	28.2208			3.36252	2.78854		0.432	nan	65.9565	-27.5035	-23.3049	-13.799		0.432	-27.5035	-27.1578	241.557	310140	4.21596
63	929m_mouse2_02-22-11_ForReAnalysis_Rand4:0000062_56	56	923.333	384.667					914.667	340		970.667	369.333		885.333	403.333		65.801	27.4132		nan	nan		65.1834	24.23		69.1743	26.3204		63.093	28.7434			3.54583	3.01713		0.44	nan	79.0203	-14.4397	-17.9499	-26.1608		0.44	-14.4397	-13.4677	2562.51	182503	44.7243
59	929m_mouse2_02-22-11_ForReAnalysis_Rand4:0000057_57	57				892.667	346.667					968	384.667		886	412		nan	nan		63.6156	24.7051		nan	nan		68.9842	27.4132		63.1405	29.361						0.448	#VALUE!	nan					0.448	13.1277
15	929m_mouse2_02-22-11_ForReAnalysis_Rand4:0000011_58	58	942	357.333		908.667	328.667					954.667	396.667		889.333	415.333		67.1313	25.4652		64.7558	23.4223		nan	nan		68.034	28.2683		63.378	29.5986		3.13308	2.94489	5.58317		0.456	40.6952	nan	40.6952	72.1495	-47.7589		0.456	40.6952	37.1179	1901.83	-190619	33.1932
26	929m_mouse2_02-22-11_ForReAnalysis_Rand4:0000023_59	59	940.667	357.333		911.333	327.333					942.667	403.333		889.333	414.667		67.0363	25.4652		64.9458	23.3273		nan	nan		67.1788	28.7434		63.378	29.5511		2.99013	3.28127	5.48431		0.464	45.6431	nan	45.6431	87.5104	-48.1603		0.464	45.6431	44.2716	111.687	-166322	1.94931
9	929m_mouse2_02-22-11_ForReAnalysis_Rand4:0000007_60	60	936	356		902	331.333					952	396		889.333	416		66.7037	25.3702		64.2807	23.6123		nan	nan		67.844	28.2208		63.378	29.6461		2.99351	3.07018	5.41696		0.472	35.9609	nan	35.9609	68.1986	-52.1248		0.472	35.9609	38.9049	-759.32	-47582.6	-13.2526
46	929m_mouse2_02-22-11_ForReAnalysis_Rand4:0000048_61	61	932.667	356.667		896	334					960.667	389.333		889.333	416.667		66.4662	25.4178		63.8531	23.8024		nan	nan		68.4616	27.7457		63.378	29.6936		3.07205	3.06609	5.27447		0.48	31.7237	nan	31.7237	49.3981	-54.1619		0.48	31.7237	32.1225	-649.635	27331.3	-11.3383
37	929m_mouse2_02-22-11_ForReAnalysis_Rand4:0000036_62	62	928	352.667		892.667	332					960.667	384.667		884	414.667		66.1336	25.1327		63.6156	23.6599		nan	nan		68.4616	27.4132		62.998	29.5511		2.91711	3.25886	5.41799		0.488	30.3242	nan	30.3242	44.4091	-54.6375		0.488	30.3242	28.5107	-322.02	32883.1	-5.6203
21	929m_mouse2_02-22-11_ForReAnalysis_Rand4:0000015_63	63	928	348.667		894	332.667					960	382.667		881.333	410		66.1336	24.8476		63.7106	23.7074		nan	nan		68.4141	27.2706		62.8079	29.2185		2.67788	3.32738	5.49226		0.496	25.2011	nan	25.2011	46.7357	-52.7333		0.496	25.2011	26.9702	-123.505	18425.1	-2.15556
12	929m_mouse2_02-22-11_ForReAnalysis_Rand4:0000010_64	64	927.333	349.333		892.667	331.333					958.667	382.667		879.333	410.667		66.0861	24.8951		63.6156	23.6123		nan	nan		68.3191	27.2706		62.6654	29.266		2.78364	3.26029	5.55035		0.504	27.4402	nan	27.4402	46.7714	-51.9533		0.504	27.4402	26.5347	-27.2185	6017.88	-0.475052
																																														30			62.4706
Rand5																																												time13	data13	butfilt13	velocity	acceleration	ω
24	929m_mouse2_02-22-11_ForReAnalysis_Rand5:00000024_1	1	892.667	408.667		860.667	381.333		912	376		926.667	442		834.667	439.333		63.6156	29.1235		61.3351	27.1756		64.9934	26.7955		66.0386	31.499		59.4823	31.3089		2.99917	3.39319	4.67553		0	40.5035	-59.3821	40.5035	44.4324	-27.8665		0	40.5035	40.2535	348.332	46285.5	6.07954
31	929m_mouse2_02-22-11_ForReAnalysis_Rand5:00000033_2	2	898.667	404		869.333	375.333		914	378		918	444.667		830	437.333		64.0432	28.7909		61.9527	26.748		65.1359	26.938		65.421	31.689		59.1497	31.1664		2.92296	3.20894	5.43962		0.008	44.3411	-59.4708	44.3411	64.5737	-25.8933		0.008	44.3411	45.8268	1088.9	63548.3	19.0049
37	929m_mouse2_02-22-11_ForReAnalysis_Rand5:00000039_3	3	902	403.333		876	365.333					908.667	440.667		826.667	436		64.2807	28.7434		62.4278	26.0353		nan	nan		64.7558	31.404		58.9121	31.0714		3.28127	2.70268	5.8516		0.016	55.6197	nan	55.6197	79.875	-23.4432		0.016	55.6197	57.6759	1365.1	-38941.4	23.8256
45	929m_mouse2_02-22-11_ForReAnalysis_Rand5:00000046_4	4	906.667	404		892.667	362.667					893.333	450		826.667	428		64.6133	28.7909		63.6156	25.8453		nan	nan		63.6631	32.0691		58.9121	30.5013		3.10996	3.41312	5.9522		0.024	71.2881	nan	71.2881	73.8347	-16.6992		0.024	71.2881	67.6685	465.837	-156086	8.1304
2	929m_mouse2_02-22-11_ForReAnalysis_Rand5:00000002_5	5	906.667	404.667		888.667	365.333					900	451.333		827.333	420.667		64.6133	28.8385		63.3306	26.0353		nan	nan		64.1382	32.1641		58.9596	29.9787		3.08269	3.3594	5.76755		0.032	65.4103	nan	65.4103	81.8694	-11.4024		0.032	65.4103	65.1293	-1132.27	-161686	-19.7619
29	929m_mouse2_02-22-11_ForReAnalysis_Rand5:00000029_6	6	902	405.333		874.667	373.333					911.333	446.667		828	410.667		64.2807	28.8859		62.3328	26.6055		nan	nan		64.9458	31.8316		59.0071	29.266		2.99913	3.01981	5.28727		0.04	49.4975	nan	49.4975	77.2763	-4.12281		0.04	49.4975	49.5521	-2121.13	-35226.2	-37.0207
8	929m_mouse2_02-22-11_ForReAnalysis_Rand5:00000013_7	7	896	406		864	386.667		914.667	374.667		922.667	438.667		829.333	401.333		63.8531	28.9335		61.5727	27.5557		65.1834	26.7005		65.7536	31.2615		59.1021	28.6009		2.66435	3.00519	4.76263		0.048	31.1385	-59.2151	31.1385	50.7743	4.00444		0.048	31.1385	31.1911	-1695.89	127541	-29.5989
43	929m_mouse2_02-22-11_ForReAnalysis_Rand5:00000045_8	8	890.667	402					902	366		930.667	427.333		832.667	397.333		63.4731	28.6484		nan	nan		64.2807	26.0829		66.3237	30.4537		59.3397	28.3158			3.37418	4.14671		0.056	nan	-72.5257	20.9343	32.3471	4.60042		0.056	20.9343	22.4178	-80.4823	214018	-1.40468
3	929m_mouse2_02-22-11_ForReAnalysis_Rand5:00000003_9	9	888.667	400					906	363.333		927.333	428		834.667	406.667		63.3306	28.5059		nan	nan		64.5658	25.8928		66.0861	30.5013		59.4823	28.981			3.40214	3.87751		0.064	nan	-64.6992	28.7608	35.9102	-7.03829		0.064	28.7608	29.9034	1728.4	164771	30.1663
48	929m_mouse2_02-22-11_ForReAnalysis_Rand5:0000050_10	10	897.333	398.667		876	372.667		921.333	371.333		923.333	436.667		830	411.333		63.9481	28.4109		62.4278	26.558		65.6585	26.4629		65.801	31.1189		59.1497	29.3135		2.39676	3.28127	4.88262		0.072	50.6311	-48.716	50.6311	55.6197	-10.6534		0.072	50.6311	50.0722	2555.86	5704.29	44.6081
59	929m_mouse2_02-22-11_ForReAnalysis_Rand5:0000059_11	11	902	402.667		888	363.333					910	446.667		828.667	415.333		64.2807	28.6959		63.283	25.8928		nan	nan		64.8508	31.8316		59.0547	29.5986		2.97539	3.18705	5.30343		0.08	70.408	nan	70.408	79.6952	-9.79939		0.08	70.408	70.7972	1819.67	-161395	31.7592
53	929m_mouse2_02-22-11_ForReAnalysis_Rand5:0000051_12	12	909.333	404		903.333	358.667					907.333	450.667		830.667	417.333		64.8033	28.7909		64.3757	25.5603		nan	nan		64.6608	32.1166		59.1972	29.7411		3.25881	3.32876	5.68606		0.088	82.4605	nan	82.4605	87.546	-9.61957		0.088	82.4605	79.1869	-26.4695	-229132	-0.461979
49	929m_mouse2_02-22-11_ForReAnalysis_Rand5:0000050_13	13	912	402.667		896	361.333					909.333	450		834.667	412		64.9934	28.6959		63.8531	25.7503		nan	nan		64.8033	32.0691		59.4823	29.361		3.15864	3.37852	5.5511		0.096	68.8391	nan	68.8391	86.7751	-6.88151		0.096	68.8391	70.3736	-1846.45	-171363	-32.2266
40	929m_mouse2_02-22-11_ForReAnalysis_Rand5:0000042_14	14	909.333	400		882.667	368					926.667	441.333		841.333	410.667		64.8033	28.5059		62.903	26.2254		nan	nan		66.0386	31.4514		59.9573	29.266		2.96848	3.19412	4.90526		0.104	50.1951	nan	50.1951	67.2481	-8.9152		0.104	50.1951	49.6437	-2768.28	-49026.5	-48.3157
11	929m_mouse2_02-22-11_ForReAnalysis_Rand5:0000014_15	15	901.333	397.333					917.333	357.333					845.333	412		64.2332	28.3158		nan	nan		65.3734	25.4652		nan	nan		60.2424	29.361				4.12543		0.112	nan	-68.1986	25.2614		-14.6767		0.112	25.2614	26.0811	-2630.87	70823.6	-45.9174
18	929m_mouse2_02-22-11_ForReAnalysis_Rand5:0000018_16	16	902	394					906	351.333		946.667	400.667		852	421.333		64.2807	28.0783		nan	nan		64.5658	25.0376		67.4639	28.5534		60.7175	30.0262			3.21844	4.06089		0.12	nan	-84.6442	8.81578	8.4893	-28.6637		0.12	8.81578	7.54976	-1635.11	155008	-28.538
36	929m_mouse2_02-22-11_ForReAnalysis_Rand5:0000036_17	17	896.667	390.667					896.667	348		944	388.667		859.333	436		63.9007	27.8408		nan	nan		63.9007	24.8001		67.2738	27.6982		61.2401	31.0714			3.37618	4.18519		0.128	nan	89.9981	-3.46188	-2.41953	-50.5268		0.128	-3.46188	-0.0805699	-150.739	180047	-2.63089
28	929m_mouse2_02-22-11_ForReAnalysis_Rand5:0000028_18	18	899.333	382.667					902.667	346.667		940.667	390.667		869.333	446.667		64.0907	27.2706		nan	nan		64.3283	24.7051		67.0363	27.8408		61.9527	31.8316			3.00032	5.03716		0.136	nan	-84.7089	8.75113	10.9539	-64.8852		0.136	8.75113	5.13795	1245.65	128953	21.7406
46	929m_mouse2_02-22-11_ForReAnalysis_Rand5:0000046_19	19	902.667	377.333		872	369.333		920	348.667		938.667	402		874	446		64.3283	26.8905		62.1428	26.3204		65.5635	24.8476		66.8938	28.6484		62.2853	31.784		2.25861	3.11	5.30285		0.144	14.6207	-58.8406	14.6207	34.4187	-67.3405		0.144	14.6207	19.8498	1912.51	15726.7	33.3796
50	929m_mouse2_02-22-11_ForReAnalysis_Rand5:0000050_20	20	910.667	373.333		886	352		933.333	353.333		933.333	413.333		870.667	441.333		64.8984	26.6055		63.1405	25.0852		66.5137	25.1802		66.5137	29.456		62.0478	31.4514		2.3241	3.27643	5.62224		0.152	40.8546	-41.4245	40.8546	60.4619	-59.5345		0.152	40.8546	35.7381	1497.27	-91788	26.1324
47	929m_mouse2_02-22-11_ForReAnalysis_Rand5:0000047_21	21	914.667	376		888	351.333		937.333	359.333		935.333	420		864	433.333		65.1834	26.7955		63.283	25.0376		66.7987	25.6077		66.6562	29.9312		61.5727	30.8813		2.58877	3.46429	5.45266		0.16	42.7689	-36.3282	42.7689	64.8414	-48.5319		0.16	42.7689	43.8062	443.902	-110171	7.74755
62	929m_mouse2_02-22-11_ForReAnalysis_Rand5:0000063_22	22	917.333	378.667		889.333	352		937.333	354.667		941.333	418.667		856.667	420.667		65.3734	26.9856		63.378	25.0852		66.7987	25.2752		67.0838	29.8362		61.0501	29.9787		2.75558	3.32433	5.25833		0.168	43.6032	-50.1944	43.6032	59.0362	-34.6954		0.168	43.6032	42.8405	-265.468	-41162.2	-4.63328
35	929m_mouse2_02-22-11_ForReAnalysis_Rand5:0000035_23	23	918	377.333		888.667	354.667		937.333	354.667		948	418.667		852.667	408		65.421	26.8905		63.3306	25.2752		66.7987	25.2752		67.5589	29.8362		60.765	29.076		2.64177	3.63973	5.14335		0.176	37.6937	-49.5374	37.6937	54.0281	-25.1451		0.176	37.6937	39.5587	-214.693	25634.1	-3.7471
7	929m_mouse2_02-22-11_ForReAnalysis_Rand5:0000009_24	24	921.333	380		890	354		936	352		944	418		850.667	400.667		65.6585	27.0806		63.4255	25.2277		66.7037	25.0852		67.2738	29.7886		60.6225	28.5534		2.90158	3.15324	5.24694		0.184	39.6858	-62.3535	39.6858	59.1839	-16.3021		0.184	39.6858	39.4055	144.677	30364.1	2.5251
12	929m_mouse2_02-22-11_ForReAnalysis_Rand5:0000015_25	25	920	380.667		890.667	354		938	356.667		941.333	422.667		850.667	396		65.5635	27.1281		63.4731	25.2277		66.8463	25.4178		67.0838	30.1212		60.6225	28.2208		2.82513	3.35709	5.06038		0.192	42.2744	-53.1301	42.2744	63.0727	-12.4703		0.192	42.2744	41.8735	271.133	-2818.12	4.73216
26	929m_mouse2_02-22-11_ForReAnalysis_Rand5:0000026_26	26	921.333	380		892	352		937.333	358.667		941.333	422.667		850.667	392		65.6585	27.0806		63.5681	25.0852		66.7987	25.5603		67.0838	30.1212		60.6225	27.9357		2.88989	3.35813	5.10808		0.2	43.6681	-53.1297	43.6681	64.8853	-9.63763		0.2	43.6681	43.7436	99.5874	-22818.3	1.73813
60	929m_mouse2_02-22-11_ForReAnalysis_Rand5:0000059_27	27	918.667	379.333		892.667	354		939.333	356.667		940	422		853.333	392.667		65.4685	27.033		63.6156	25.2277		66.9412	25.4178		66.9888	30.0737		60.8125	27.9833		2.58698	3.39953	4.75198		0.208	44.2556	-47.6426	44.2556	63.4355	-11.5351		0.208	44.2556	43.4669	-93.96	-13447.2	-1.63991
38	929m_mouse2_02-22-11_ForReAnalysis_Rand5:0000039_28	28	920	376		893.333	352.667		939.333	353.333		944.667	420.667		854	393.333		65.5635	26.7955		63.6631	25.1327		66.9412	25.1802		67.3214	29.9787		60.86	28.0307		2.52518	3.63632	4.86296		0.216	41.1852	-49.5387	41.1852	61.0907	-14.7148		0.216	41.1852	42.2402	-115.567	861.155	-2.01703
25	929m_mouse2_02-22-11_ForReAnalysis_Rand5:0000025_29	29	922	376		893.333	350.667		939.333	351.333		943.333	418.667		856	395.333		65.706	26.7955		63.6631	24.9902		66.9412	25.0376		67.2263	29.8362		61.0026	28.1733		2.72633	3.39953	4.90111		0.224	41.467	-54.9051	41.467	63.4355	-16.3266		0.224	41.467	41.6178	-80.1815	-1773.39	-1.39943
6	929m_mouse2_02-22-11_ForReAnalysis_Rand5:0000008_30	30	922	376.667		895.333	352.667		940.667	352		944.667	420		854.667	396		65.706	26.843		63.8056	25.1327		67.0363	25.0852		67.3214	29.9312		60.9076	28.2208		2.55673	3.48508	4.99234		0.232	41.9869	-52.883	41.9869	62.3864	-16.0201		0.232	41.9869	40.9573	-143.942	-6181.69	-2.51226
21	929m_mouse2_02-22-11_ForReAnalysis_Rand5:0000023_31	31	923.333	374.667		894.667	351.333		940	352.667		947.333	417.333		854	397.333		65.801	26.7005		63.7581	25.0376		66.9888	25.1327		67.5114	29.7411		60.86	28.3158		2.63411	3.48861	5.19832		0.24	39.1454	-52.8528	39.1454	60.6419	-18.1033		0.24	39.1454	39.3148	-179.088	5048.74	-3.12568
22	929m_mouse2_02-22-11_ForReAnalysis_Rand5:0000023_32	32	925.333	375.333		894.667	352		941.333	354.667		946	418.667		854	400		65.9435	26.748		63.7581	25.0852		67.0838	25.2752		67.4164	29.8362		60.86	28.5059		2.74608	3.42142	5.37888		0.248	37.2666	-52.2523	37.2666	64.5024	-19.0754		0.248	37.2666	38.0919	-63.1618	11093	-1.10238
54	929m_mouse2_02-22-11_ForReAnalysis_Rand5:0000052_33	33	924	374.667		896	352.667		941.333	354.667		947.333	417.333		858.667	412		65.8485	26.7005		63.8531	25.1327		67.0838	25.2752		67.5114	29.7411		61.1926	29.361		2.53766	3.46556	5.36247		0.256	38.1572	-49.0862	38.1572	61.3268	-29.7448		0.256	38.1572	38.3042	-1.60015	-5521.05	-0.0279279
63	929m_mouse2_02-22-11_ForReAnalysis_Rand5:0000063_34	34	923.333	375.333		896.667	353.333		941.333	355.333		948.667	416.667		862	418		65.801	26.748		63.9007	25.1802		67.0838	25.3227		67.6064	29.6936		61.4301	29.7886		2.46361	3.45491	5.32448		0.264	39.5233	-48.0128	39.5233	58.4955	-34.8248		0.264	39.5233	38.0663	-151.499	-19777.7	-2.64415
39	929m_mouse2_02-22-11_ForReAnalysis_Rand5:0000041_35	35	924.667	373.333		896	353.333		941.333	354.667		951.333	414		866	424.667		65.8961	26.6055		63.8531	25.1802		67.0838	25.2752		67.7964	29.5036		61.7152	30.2638		2.491	3.4656	5.55544		0.272	34.9022	-48.2398	34.9022	56.7465	-41.1861		0.272	34.9022	35.8802	-318.043	-9362.68	-5.55089
55	929m_mouse2_02-22-11_ForReAnalysis_Rand5:0000052_36	36	920.667	376		892	357.333		938.667	358.667		953.333	414		867.333	433.333		65.611	26.7955		63.5681	25.4652		66.8938	25.5603		67.939	29.5036		61.8102	30.8813		2.43789	3.57111	5.58034		0.28	33.0708	-43.9185	33.0708	49.3166	-47.0695		0.28	33.0708	32.9776	-301.301	13518.1	-5.2587
23	929m_mouse2_02-22-11_ForReAnalysis_Rand5:0000023_37	37	922.667	377.333		890	357.333		936	354.667		953.333	414		874.667	441.333		65.7536	26.8905		63.4255	25.4652		66.7037	25.2752		67.939	29.5036		62.3328	31.4514		2.72966	3.40648	5.70117		0.288	31.4766	-59.5343	31.4766	50.093	-53.1301		0.288	31.4766	31.0594	-101.754	36105.5	-1.77594
32	929m_mouse2_02-22-11_ForReAnalysis_Rand5:0000033_38	38	920.667	380		887.333	360		933.333	358		956	410.667		881.333	446.667		65.611	27.0806		63.2355	25.6553		66.5137	25.5127		68.129	29.266		62.8079	31.8316		2.77031	3.33415	5.5163		0.296	30.9633	-60.0698	30.9633	40.9561	-59.4591		0.296	30.9633	31.3496	276.386	55220.9	4.82385
13	929m_mouse2_02-22-11_ForReAnalysis_Rand5:0000015_39	39	922.667	382		892	360		940	358		954.667	414		882	446.667		65.7536	27.2231		63.5681	25.6553		66.9888	25.5127		68.034	29.5036		62.8554	31.8316		2.68968	3.22507	5.444		0.304	35.655	-54.1629	35.655	45	-57.8355		0.304	35.655	35.4816	781.781	50101.6	13.6446
41	929m_mouse2_02-22-11_ForReAnalysis_Rand5:0000044_40	40	926.667	380		898.667	354.667					950	420.667		880	446.667		66.0386	27.0806		64.0432	25.2752		nan	nan		67.7014	29.9787		62.7129	31.8316		2.6909	3.34127	5.79934		0.312	42.1372	nan	42.1372	60.1546	-55.0079		0.312	42.1372	43.858	1078.01	-8607.82	18.8149
64	929m_mouse2_02-22-11_ForReAnalysis_Rand5:0000063_41	41	932	384.667		906.667	349.333					941.333	432		877.333	440.667		66.4187	27.4132		64.6133	24.8951		nan	nan		67.0838	30.7863		62.5228	31.404		3.09838	3.43812	5.57711		0.32	54.3611	nan	54.3611	78.8457	-45.6901		0.32	54.3611	52.7298	644.056	-116817	11.2409
16	929m_mouse2_02-22-11_ForReAnalysis_Rand5:0000017_42	42	936.667	388		909.333	352.667					941.333	438.667		874.667	433.333		66.7513	27.6507		64.8033	25.1327		nan	nan		67.0838	31.2615		62.3328	30.8813		3.18352	3.62605	5.47352		0.328	52.2741	nan	52.2741	84.7384	-36.1734		0.328	52.2741	54.1629	-791.061	-209058	-13.8066
51	929m_mouse2_02-22-11_ForReAnalysis_Rand5:0000050_43	43	924.667	395.333		894.667	366					952	436		872.667	424.667		65.8961	28.1733		63.7581	26.0829		nan	nan		67.844	31.0714		62.1903	30.2638		2.99008	3.49189	4.25474		0.336	44.3559	nan	44.3559	56.0943	-29.428		0.336	44.3559	40.0728	-2700.88	-179246	-47.1392
33	929m_mouse2_02-22-11_ForReAnalysis_Rand5:0000033_44	44										964.667	426.667		878	417.333		nan	nan		nan	nan		nan	nan		68.7467	30.4063		62.5704	29.7411						0.344	nan	nan					0.344	11.3713
42	929m_mouse2_02-22-11_ForReAnalysis_Rand5:0000044_45	45	920.667	404					907.333	363.333		966	409.333		884.667	420.667		65.611	28.7909		nan	nan		64.6608	25.8928		68.8417	29.171		63.0455	29.9787			3.25292	2.82714		0.352	nan	71.8466	-21.6134	6.70947	-24.8428		0.352	-21.6134	-18.4712	-2506.67	249795	-43.7497
19	929m_mouse2_02-22-11_ForReAnalysis_Rand5:0000020_46	46	920	406.667					901.333	367.333		967.333	397.333		884	435.333		65.5635	28.981		nan	nan		64.2332	26.1779		68.9367	28.3158		62.998	31.0239			3.43813	3.27952		0.36	nan	64.6121	-28.8479	-11.1555	-38.5295		0.36	-28.8479	-29.1579	337.716	355698	5.89426
5	929m_mouse2_02-22-11_ForReAnalysis_Rand5:0000006_47	47	920	401.333					912	364		968	402		884	447.333		65.5635	28.6009		nan	nan		64.9934	25.9403		68.9842	28.6484		62.998	31.879			3.42103	4.16273		0.368	nan	77.9051	-15.5549	0.796121	-51.953		0.368	-15.5549	-13.0678	3184.5	246287	55.58
17	929m_mouse2_02-22-11_ForReAnalysis_Rand5:0000017_48	48	926	396								960	428		881.333	447.333		65.9911	28.2208		nan	nan		nan	nan		68.4141	30.5013		62.8079	31.879			3.32738	4.84925		0.376	nan	nan		43.2643	-48.9721		0.376	21.392
44	929m_mouse2_02-22-11_ForReAnalysis_Rand5:0000045_49	49	934	396		909.333	356					938.667	444		880	446		66.5612	28.2208		64.8033	25.3702		nan	nan		66.8938	31.6415		62.7129	31.784		3.34903	3.43683	5.24461		0.384	58.3389	nan	58.3389	84.4466	-42.7974		0.384	58.3389	55.3852	3001.85	-231565	52.3922
27	929m_mouse2_02-22-11_ForReAnalysis_Rand5:0000027_50	50	939.333	396.667		925.333	351.333					929.333	441.333		879.333	437.333		66.9412	28.2683		65.9435	25.0376		nan	nan		66.2286	31.4514		62.6654	31.1664		3.38126	3.26191	5.16545		0.392	72.8383	nan	72.8383	77.3805	-34.1281		0.392	72.8383	69.8238	573.262	-273325	10.0053
14	929m_mouse2_02-22-11_ForReAnalysis_Rand5:0000016_51	51	942.667	395.333		917.333	349.333					932.667	440.667		876.667	426		67.1788	28.1733		65.3734	24.8951		nan	nan		66.4662	31.404		62.4754	30.3587		3.74245	3.30838	5.18642		0.4	61.1567	nan	61.1567	77.5606	-24.922		0.4	61.1567	64.5574	-1371.35	-207681	-23.9346
34	929m_mouse2_02-22-11_ForReAnalysis_Rand5:0000034_52	52	934.667	391.333		898.667	357.333					933.333	444		880.667	414		66.6087	27.8882		64.0432	25.4652		nan	nan		66.5137	31.6415		62.7604	29.5036		3.52886	3.7545	4.17357		0.408	43.3634	nan	43.3634	88.5491	-22.7707		0.408	43.3634	47.8822	-2749.63	-137997	-47.9902
4	929m_mouse2_02-22-11_ForReAnalysis_Rand5:0000004_53	53	928	391.333		888	364					961.333	416		885.333	402		66.1336	27.8882		63.283	25.9403		nan	nan		68.5091	29.6461		63.093	28.6484		3.45255	2.95516	3.13423		0.416	34.3458	nan	34.3458	36.5021	-14.0366		0.416	34.3458	20.5632	-3579.3	22006.6	-62.4706
58	929m_mouse2_02-22-11_ForReAnalysis_Rand5:0000055_54	54	926.667	390					916.667	350		967.333	394		887.333	400		66.0386	27.7932		nan	nan		65.326	24.9426		68.9367	28.0783		63.2355	28.5059			2.91203	2.8923		0.424	nan	75.9638	-17.4962	5.61767	-14.2643		0.424	-17.4962	-9.38669	-2397.53	269946	-41.8448
20	929m_mouse2_02-22-11_ForReAnalysis_Rand5:0000021_55	55	923.333	391.333					903.333	342.667		970.667	368		890	396.667		65.801	27.8882		nan	nan		64.3757	24.42		69.1743	26.2254		63.4255	28.2683			3.76081	2.40569		0.432	nan	67.6591	-25.8009	-26.2407	-9.09148		0.432	-25.8009	-17.7972	739.827	339090	12.9124
15	929m_mouse2_02-22-11_ForReAnalysis_Rand5:0000016_56	56	916.667	385.333					921.333	348		971.333	368.667		886	403.333		65.326	27.4606		nan	nan		65.6585	24.8001		69.2217	26.2729		63.1405	28.7434			4.07278	2.53412		0.44	nan	-82.8759	10.5841	-16.9549	-30.4108		0.44	10.5841	2.45054	3027.91	130154	52.847
52	929m_mouse2_02-22-11_ForReAnalysis_Rand5:0000050_57	57	930	368.667								968	384.667		886.667	410		66.2761	26.2729		nan	nan		nan	nan		68.9842	27.4132		63.188	29.2185			2.93832	4.26766		0.448	nan	nan		22.8337	-43.6468		0.448	29.0101
9	929m_mouse2_02-22-11_ForReAnalysis_Rand5:0000013_58	58	938.667	363.333		908.667	330.667					957.333	398		886.667	417.333		66.8938	25.8928		64.7558	23.5649		nan	nan		68.224	28.3633		63.188	29.7411		3.1607	2.80589	5.34247		0.456	47.4361	nan	47.4361	61.7003	-46.0809		0.456	47.4361	47.6072	1101.06	-213951	19.2171
10	929m_mouse2_02-22-11_ForReAnalysis_Rand5:0000013_59	59	940.667	360		914	325.333					944	404		888.667	416.667		67.0363	25.6553		65.1359	23.1847		nan	nan		67.2738	28.7909		63.3306	29.6936		3.11691	3.14463	5.48097		0.464	52.4313	nan	52.4313	85.6681	-47.4592		0.464	52.4313	48.2663	-600.923	-147904	-10.4881
1	929m_mouse2_02-22-11_ForReAnalysis_Rand5:0000001_60	60	936	355.333		900.667	331.333					952.667	397.333		889.333	417.333		66.7037	25.3227		64.1857	23.6123		nan	nan		67.8915	28.3158		63.378	29.7411		3.04394	3.22018	5.53016		0.472	34.1864	nan	34.1864	68.3552	-53.0315		0.472	34.1864	37.9924	-1265.41	-14079.4	-22.0855
61	929m_mouse2_02-22-11_ForReAnalysis_Rand5:0000062_61	61	934	354		895.333	333.333					961.333	388.667		888	415.333		66.5612	25.2277		63.8056	23.7549		nan	nan		68.5091	27.6982		63.283	29.5986		3.1245	3.14607	5.46361		0.48	28.1239	nan	28.1239	51.7462	-53.13		0.48	28.1239	28.0198	-826.193	69582.5	-14.4198
57	929m_mouse2_02-22-11_ForReAnalysis_Rand5:0000054_62	62	930.667	351.333		892.667	334					960	385.333		884.667	414		66.3237	25.0376		63.6156	23.8024		nan	nan		68.4141	27.4606		63.0455	29.5036		2.97647	3.20011	5.53995		0.488	24.5192	nan	24.5192	49.2145	-53.7199		0.488	24.5192	24.7733	-152.086	57356.6	-2.6544
56	929m_mouse2_02-22-11_ForReAnalysis_Rand5:0000053_63	63	927.333	349.333		889.333	331.333					960	383.333		880	411.333		66.0861	24.8951		63.378	23.6123		nan	nan		68.4141	27.3181		62.7129	29.3135		2.99651	3.36014	5.55883		0.496	25.3462	nan	25.3462	46.1455	-52.6406		0.496	25.3462	25.5864	91.5127	12048.7	1.5972
30	929m_mouse2_02-22-11_ForReAnalysis_Rand5:0000032_64	64	924.667	350		891.333	330.667					959.333	382.667		878.667	409.333		65.8961	24.9426		63.5205	23.5649		nan	nan		68.3665	27.2706		62.6179	29.171		2.74616	3.39452	5.35027		0.504	30.1128	nan	30.1128	43.2995	-52.2141		0.504	30.1128	26.2375	40.6931	-3176.22	0.710229
[truncated: 40 more columns]
